1 **Measuring the host-seeking ability of *Aedes aegypti* destined for field release**

2 Running head: Measuring *Aedes aegypti* host-seeking ability

3

4 Meng-Jia Lau<sup>1\*</sup>; Nancy M. Endersby-Harshman<sup>1</sup>; Jason K. Axford<sup>1</sup>; Scott A. Ritchie<sup>2,3</sup>; Ary A.

5 Hoffmann<sup>1</sup>; Perran A. Ross<sup>1</sup>

6

7 <sup>1</sup>Pest and Environmental Adaptation Research Group, Bio21 Institute and the School of

8 BioSciences, The University of Melbourne, Parkville, Victoria, Australia

9 <sup>2</sup>College of Public Health, Medical and Veterinary Sciences, James Cook University,

10 Smithfield, Queensland, Australia

11 <sup>3</sup>Australian Institute of Tropical Health and Medicine, James Cook University, Smithfield,

12 Queensland, Australia

13 \* Corresponding author. Email: [mengjial2@student.unimelb.edu.au](mailto:mengjial2@student.unimelb.edu.au), phone: +61449830399

14 Keywords: Host-seeking, Semi-field, *Aedes aegypti*, *Wolbachia*, laboratory adaptation.

15 Abstract word count: 209

16 Main text word count: 3737

17 Number of figures: 4

18 Number of tables: 0

19 Number of supplementary figures: 5

20 Number of supplementary tables: 3

21

22

23

24

25 **Abstract**

26

27 Host-seeking is an essential process in mosquito reproduction. Field releases of modified  
28 mosquitoes for population transformation rely on successful host-seeking by female  
29 mosquitoes, but host-seeking ability is rarely tested in a realistic context. We tested the  
30 host-seeking ability of female *Aedes aegypti* mosquitoes using a semi-field system. Females  
31 with different *Wolbachia* infection types (*wMel*-, *wAlbB*-infected and uninfected) or from  
32 different origins (laboratory and field) were released at one end of a semi-field cage and  
33 recaptured as they landed on human experimenters fifteen meters away. Mosquitoes from  
34 each population were then identified with molecular tools or through marking with a  
35 consistent weight of fluorescent powder. *Wolbachia*-infected and uninfected populations  
36 had similar average durations to landing and overall recapture proportions, as did  
37 laboratory and field-sourced *A. aegypti*. These results suggest that the host-seeking ability  
38 of mosquitoes is not negatively affected by *Wolbachia* infection or long-term laboratory  
39 maintenance. This method provides an approach to study the host-seeking ability of  
40 mosquitoes across a long distance which will be useful when evaluating strains of  
41 mosquitoes that are planned for releases into the field to suppress arbovirus transmission.  
42 An adjustment of this method may also be useful in sterile insect release programs because  
43 male host-seeking and swarming around female feeding sites can also be investigated.

44

45

46

47

48

## 49 Introduction

50

51 The management of arboviral diseases has become increasingly important to global health  
52 in recent decades.<sup>1</sup> The occurrence of arboviral diseases such as dengue, Zika, Japanese  
53 encephalitis and West Nile fever is increasing, especially in tropical and subtropical areas.<sup>2,3,</sup>

54 <sup>4</sup> These viruses require blood-feeding mosquitoes to complete their life cycle,<sup>5</sup> with  
55 mosquitoes from the genera of *Culex* and *Aedes* being particularly important.<sup>6</sup> An effective  
56 way to control arbovirus transmission is to suppress the vector mosquito populations.

57 Pesticides are widely used for this purpose but this can lead to the evolution of physiological  
58 resistance, alongside other undesirable effects associated with pesticide use.<sup>7, 8</sup> The sterile  
59 insect technique (SIT),<sup>9</sup> incompatible insect technique (IIT),<sup>10</sup> and the release of insects  
60 carrying a dominant lethal gene (RIDL)<sup>11</sup> are promising non-insecticidal alternatives, where  
61 wild-type females that mate with the released “modified” males have few viable offspring,  
62 decreasing the population size.

63

64 An alternative approach aims to decrease the ability of mosquitoes to transmit viruses by  
65 introducing endosymbiotic *Wolbachia* bacteria.<sup>12, 13</sup> *Wolbachia* are transmitted maternally  
66 and can invade natural populations through cytoplasmic incompatibility and any beneficial  
67 effects on host reproduction.<sup>14, 15</sup> When introduced into mosquitoes from other insects,  
68 some *Wolbachia* strains reduce their capacity to transmit viruses.<sup>12, 16</sup> *Aedes aegypti*  
69 infected with the *wMel* *Wolbachia* strain have been introduced into field populations, with  
70 the first releases taking place in Cairns, Australia in 2011.<sup>17</sup> In locations in Australia where  
71 *Wolbachia* have established there have been no confirmed locally-transmitted cases of  
72 dengue occurring within the release areas.<sup>18, 19</sup>

73

74 Population replacement and suppression strategies ideally should be preceded by  
75 investigations to assess their potential for success, address safety concerns,<sup>20</sup> and perform  
76 community engagement.<sup>18, 21</sup> When using *Wolbachia* to block arbovirus transmission, fitness  
77 costs imposed on their hosts such as adult life-shortening,<sup>22</sup> reduced quiescent egg  
78 viability,<sup>23</sup> and reduced starvation resistance of larvae<sup>24</sup> must be considered. Such effects  
79 mean that *Wolbachia* must exceed a threshold frequency in order to spread in natural  
80 populations.<sup>17, 25, 26</sup> SIT, IIT and RIDL programs are simpler in that the only concern is male  
81 fitness, but still require the released males to have a high competitiveness to ensure  
82 successful mating with wild females.<sup>27</sup> Populations reared in the laboratory can adapt to the  
83 artificial conditions which may reduce field performance.<sup>28, 29</sup> For instance, laboratory  
84 maintenance can lead to the loss of pesticide resistance,<sup>30</sup> greatly reducing fitness in release  
85 areas with heavy pesticide use.<sup>21</sup>

86

87 Fitness assays are usually carried out in the laboratory to detect fitness costs, but during  
88 releases mosquitoes must locate hosts or mates under variable environmental conditions.  
89 Performance under laboratory conditions often does not translate to performance in the  
90 field.<sup>31, 32, 33</sup> Males from the transgenic OX3604C strain of *A. aegypti* successfully suppressed  
91 laboratory populations<sup>34</sup> but were much less effective under semi-field conditions due to a  
92 strong mating disadvantage.<sup>35</sup> For *Wolbachia* releases, density-dependent effects,<sup>25</sup> loss of  
93 cytoplasmic incompatibility,<sup>36</sup> and incomplete maternal transmission<sup>37</sup> may account for the  
94 slower-than-expected spatial spread of infections in natural populations<sup>37, 38</sup> or even failed  
95 establishment<sup>39</sup> despite success under more controlled conditions.<sup>12</sup>

96

97 Successful host-seeking is key to population replacement programs since female mosquitoes  
98 require blood for reproduction. Females locate a potential blood source by tracking exhaled  
99 CO<sub>2</sub> over tens of meters, then approach and land on the host by detecting thermal plumes,  
100 host odors, moisture and visual contrast.<sup>40, 41, 42</sup> *Wolbachia* infections do not affect the  
101 attraction of *A. aegypti* to human odors in the laboratory,<sup>43</sup> but successful host-seeking in  
102 the field will depend on the detection of olfactory cues from a long distance, visual and  
103 temperature signals from a shorter distance and flight ability.

104

105 In this paper, we tested the host-seeking ability of female *A. aegypti* using a semi-field cage  
106 in North Queensland, Australia<sup>44</sup> to simulate an outdoor setting. Females were released at  
107 one end of the semi-field cage and then recaptured by two experimenters seated at the  
108 other end. This method allows for a direct comparison of host-seeking ability between  
109 different mosquito strains in a common environment. To test the method we compared  
110 mosquitoes with the wMel and wAlbB *Wolbachia* strains, which are now being released into  
111 the field in disease control programs,<sup>17</sup> (Nazni et al., unpublished data) against uninfected  
112 counterparts. To evaluate whether laboratory adaptation could affect host-seeking as  
113 demonstrated in laboratory experiments previously,<sup>45</sup> we also compared a laboratory  
114 population to a population collected recently from the field.

115

## 116 **Material and Methods**

117

### 118 *Mosquito strains and maintenance*

119

120 *A. aegypti* mosquitoes in this study were reared at 26-28°C in a controlled temperature  
121 room at James Cook University, Cairns, using methods described previously.<sup>46</sup> We  
122 performed two sets of experiments to compare the effects of *Wolbachia* infection and  
123 laboratory maintenance on host-seeking ability respectively. To test for the effects of  
124 *Wolbachia* infection, we used uninfected, *wMel*-infected and *wAlbB*-infected *A. aegypti*  
125 with a similar genetic background. Populations infected with *wMel* and *wAlbB* were derived  
126 from lines transinfected previously.<sup>12, 47</sup> The *wMel* population was collected from Cairns,  
127 Australia in May 2013 from regions that had been invaded two years earlier<sup>17, 48</sup> while the  
128 *wAlbB* population was crossed to an Australian background and maintained in the  
129 laboratory.<sup>49</sup> The uninfected population was established from *A. aegypti* (*Wolbachia*-  
130 uninfected) eggs collected in Cairns, Queensland, Australia in November 2015.<sup>50</sup> Females  
131 from all *Wolbachia*-infected lines were backcrossed for three generations to the uninfected  
132 males to ensure a similar genetic background before the experiments.<sup>23</sup> To test for the  
133 effects of laboratory maintenance we compared the host-seeking ability of laboratory and  
134 field populations. The laboratory population was identical to the uninfected population  
135 described above and had been maintained in the laboratory for 27 generations. The field  
136 population of *A. aegypti* (*Wolbachia*-uninfected) was collected in September 2018 from the  
137 same location as the laboratory population and was a mix of the first and second laboratory  
138 generations at the time of experiments.

139

140 For each release, the compared colonies were hatched synchronously, provided with  
141 TetraMin® fish food tablets (Tetra, Melle, Germany) *ad libitum* and the larval density was  
142 controlled to 150 in 1 L water to ensure matched eclosion. After pupation, approximately 80  
143 pupae were selected with a mix of 80% females and 20% males and left to emerge as adults

144 in one cage (BugDorm-4M1515 Insect Rearing Cage). Each cage was provided with a cup of  
145 10% sucrose and water and left for at least 4 d to ensure that females had matured and  
146 mated, but not blood fed. One day before the release, sugar cups were removed with only  
147 water cups remaining to starve the females, since sugar feeding may affect host-seeking  
148 behavior.<sup>51, 52</sup> The released females were 5 d old in both the *Wolbachia* infection  
149 comparison and the laboratory maintenance comparison.

150

### 151 **Release-recapture method**

152

153 We used a semi-field system (17.5 × 8.4 m) at James Cook University, Cairns, Australia  
154 containing soil, vegetation, a “Queenslander” house structure (Qld) and a ventilation system  
155 to match outside ambient temperatures to simulate natural conditions (Figure 1).<sup>44</sup>  
156 Mosquitoes were released near the door side from a box with a mesh lid while two  
157 experimenters were seated within the Qld structure to attract mosquitoes from the other  
158 end (Figure 1). Two temperature loggers (Thermochron; 1-Wire, iButton.com, Dallas  
159 Semiconductors, Sunnyvale, CA, USA) were placed near the release point and two were  
160 placed under the Qld structure to monitor temperatures during experiments  
161 (Supplementary Table 1).

162

163

164 **Figure 1.** Interior of the semi-field cage. (a) View of the door from inside the Qld. (b) View of  
165 the Qld from the door. (c) Schematic diagram of the cage showing the release point and the  
166 location of two experimenters.

167

168

169 Females from all populations in the comparison were aspirated into a single release box  
170 (Supplementary Figure 1) and placed in the semi-field cage to acclimate for at least 30  
171 minutes before experiments commenced. For the *Wolbachia* infection comparison, 50  
172 uninfected, 50 *wMel*-infected and 50 *wAlbB*-infected females were released into the box.  
173 For the laboratory maintenance comparison, 50 laboratory and 50 field source females were  
174 released. Females that were damaged during handling were replaced.

175

176 Two experimenters wore bug net mesh hats, long-sleeved shirts and shorts, exposing only  
177 their lower legs to restrict the area where mosquitoes could land. The same two  
178 experimenters undertook all experiments. Experimenters sat on the floor within the Qld  
179 structure, 1 m apart (Figure 1) with an electronic timer, mechanical aspirators (Model  
180 2809C, BioQuip Products, Inc, Rancho Dominguez, CA, USA) and 15 collection vials nearby.  
181 The experiment commenced by pulling the fishing line to remove the mesh lid from the box  
182 to release the mosquitoes (Supplementary Figure 1), after which the timer was immediately  
183 started. Females landing on exposed skin were collected with mechanical aspirators as they  
184 landed. Collection vials were replaced with empty vials at 3-minute intervals until 42  
185 minutes had elapsed. After 42 minutes, both experimenters moved to the opposite end of  
186 the cage to capture mosquitoes that did not land during the experiment. Collections  
187 occurred until no more mosquitoes were detected after a thorough search of the semi-field  
188 cage. Between experiments, two Biogents Sentinel (BGS) traps (Biogents AG, Regensburg,  
189 Germany) were placed inside the semi-field cage to assist in the capture of any remaining  
190 mosquitoes. At least one hour before each experiment commenced, the experimenters



191 searched the semi-field cage and used an electric mosquito swatter to kill any mosquitoes  
192 found.

193

194

195 *Wolbachia infection comparison*

196

197 The host-seeking experiment was repeated seven times with 50 uninfected, 50 wMel-  
198 infected and 50 wAlbB-infected females. Females collected from each replicate and time  
199 interval were stored in absolute ethanol at 4°C for wing length measurements, DNA  
200 extraction and *Wolbachia* screening. One replicate was discarded from other analyses due  
201 to the loss of samples during wing dissection.

202

203 Field-collected *A. aegypti* are smaller and more variable in size than laboratory-reared *A.*  
204 *aegypti*.<sup>53</sup> Since host-seeking females collected from the field in a previous experiment  
205 tended to be larger than non-host-seeking females,<sup>54</sup> we tested whether host-seeking speed  
206 and successful host seeking within 42 minutes was affected by size. We measured the wing  
207 length of females from two experimental replicates to obtain an indication of their body  
208 size.<sup>55</sup> Intact wings were dissected from individual females and fixed under a 10 mm circular  
209 coverslip (Menzel-Gläser, Braunschweig, Germany) using Hoyer's solution<sup>56</sup> for further  
210 observation and measurement with an NIS Elements BR imaging microscope (Nikon  
211 Instruments, Japan).<sup>24</sup>

212

213 DNA extraction and *Wolbachia* screening were conducted according to the methods of Lee,  
214 et al.<sup>57</sup> DNA from whole mosquitoes was extracted using 200 µL of 5% Chelex 100 Resin

215 (Bio-Rad Laboratories, Hercules, CA) and 3  $\mu$ L of Proteinase K (20 mg/ mL, Bioline Australia  
216 Pty Ltd, Alexandria NSW, Australia). Extractions were diluted by 1/10, pipetted into four  
217 positions of a 384-well plate and amplified with mosquito-specific (*mRpS6*) primers, *A.*  
218 *aegypti*-specific (*aRpS6*) primers, *Wolbachia* wMel-specific (*w1*) primers and *Wolbachia*  
219 wAlbB-specific (*wAlbB*) primers<sup>48, 49, 58, 59</sup> using a LightCycler 480 system (Roche Applied  
220 Science, Indianapolis, IN, USA). Robust and similar amplification of *mRpS6* and *aRpS6* (within  
221 one cycle) was expected for each individual. Uninfected *A. aegypti* were expected to show  
222 no amplification and therefore, no crossing point (Cp) value, with both *w1* and *wAlbB*  
223 primers. *A. aegypti* were classified as wMel-infected when they exhibited no amplification  
224 with *wAlbB* primers and low Cp values (< 28) and a Tm within the expected range for *w1*  
225 primers based on wMel-infected laboratory controls. wAlbB-infected *A. aegypti* tested  
226 positive for *wAlbB*, *mRpS6* and *aRpS6* primers but also showed late amplification (Cp > 28)  
227 with *w1* primers. Individuals were therefore classified as wAlbB-infected when they  
228 exhibited a low Cp value (< 28) with *wAlbB* primers, a Tm within the expected range for  
229 *wAlbB* primers and an amplification curve shape consistent with wAlbB-infected laboratory  
230 control values (Supplementary Figure 2). At least two consistent technical replicates were  
231 obtained for each individual.

232

### 233 *Laboratory maintenance comparison*

234

235 In this experiment, laboratory and field populations were marked with different colors of  
236 fluorescent powder (DayGlo, Barnes Products Pty Ltd, Moorebank, NSW, Australia) before  
237 release since the two populations could not be distinguished by molecular assays. Orange,  
238 blue and yellow colors were used and were cycled between replicates. To reduce potential

239 negative effects of marking, we used a minimal, but visually identifiable amount  
240 (Supplementary Figure 3) by weighing powder on a microbalance (Sartorius BP 210 D). One  
241 hour before the release, 50 females from each population were aspirated into two separate  
242 70-mL specimen cups containing approximately 0.4 mg of fluorescent powder in different  
243 colors. The cups were shaken gently to coat the mosquitoes evenly in powder before placing  
244 them in the release box (Supplementary Figure 1). Recaptured females were killed by  
245 freezing at -20 °C for 30 minutes and identified under a microscope using a UV flashlight.  
246 This experiment was repeated six times.

247

#### 248 *Data analyses*

249

250 Data visualization and ANOVA analyses were conducted using R studio with the packages  
251 Rmisc,<sup>60</sup> plyr,<sup>61</sup> and ggplot2.<sup>62</sup> Mosquitoes were captured at three-minute intervals and  
252 assigned a value based on the median time of each catching interval for average landing  
253 time calculations. Mosquitoes caught after 42 minutes were considered as not landing. A  
254 two-way ANOVA analyzed differences in average landing time of the landed mosquitoes and  
255 the number of females that landed by treating population as a fixed factor and experimental  
256 replicate as a random factor. One-way ANOVA was used to compare the wing length of  
257 mosquitoes caught at different intervals by treating landing time as a factor. Cumulative  
258 landing proportions over time were analyzed with log-rank tests in IBM SPSS Statistics  
259 version 25 by combining replicate experiments together.

260

261

## 262 **Results**

263

264 *Wolbachia* infection comparison

265

266 We compared the host-seeking ability of uninfected, *wMel*-infected and *wAlbB*-infected  
267 females when released simultaneously in a semi-field cage. On average, more than 30% of  
268 the mosquitoes were captured during the first three minutes of the experiment, with  
269 approximately 70% landing over the course of 42 minutes (Figure 2A). We compared the  
270 cumulative landing proportions of each population when combined across replicates and  
271 found no significant differences between *Wolbachia*-infected and uninfected females (log-  
272 rank: *wMel* : uninfected:  $\chi^2 = 1.428$ ,  $df = 1$ ,  $P = 0.232$ ; *wAlbB* : uninfected:  $\chi^2 = 2.9$ ,  $df = 1$ ,  $P$   
273  $= 0.089$ , Figure 3A).

274

275 The average time to landing of each population was used as an estimate of host-seeking  
276 speed (Figure 2b, 2d). Average time to landing did not differ significantly between  
277 uninfected (mean  $\pm$  SE:  $9.5 \pm 0.9$  minutes), *wMel*-infected ( $7.6 \pm 0.6$  minutes) and *wAlbB*-  
278 infected ( $7.5 \pm 0.3$  minutes) females (two-way ANOVA: *wMel* : uninfected:  $F_{1,5} = 2.503$ ,  $P =$   
279  $0.174$ ; *wAlbB* : uninfected:  $F_{1,5} = 6.434$ ,  $P = 0.052$ ). There was also no significant effect of  
280 replicate on average time to landing in either comparison (*wMel* : uninfected:  $F_{5,5} = 0.617$ ,  $P$   
281  $= 0.696$ ; *wAlbB* : uninfected:  $F_{5,5} = 2.009$ ,  $P = 0.231$ ). We compared the total proportion of  
282 females landing as an indicator of overall host-seeking success (Figure 2c, 2e); here there  
283 were also no significant differences between populations (*wMel* : uninfected:  $F_{1,5} = 0.282$ ,  $P$   
284  $= 0.618$ , *wAlbB* : uninfected:  $F_{1,5} = 2.426$ ,  $P = 0.180$ ). There was a significant effect of  
285 replicate in the *wAlbB* comparison ( $F_{5,5} = 7.505$ ,  $P = 0.023$ ) but not in the *wMel* comparison  
286 ( $F_{5,5} = 3.482$ ,  $P = 0.099$ ).

287

288

289 **Figure 2.** Host-seeking ability of 5 d old *wMel*-infected, *wAlbB*-infected and uninfected *A.*

290 *aegypti* females in a semi-field cage. (a) Cumulative landing proportions of females on

291 human experimenters across all replicates. Lines represent means and error bars represent

292 standard errors. (b-c) Comparisons of average time to landing (b) and proportion landing (c)

293 between uninfected and *wMel*-infected females, plotted separately for each replicate. (d-e)

294 Comparisons of average time to landing (d) and proportion landing (e) between uninfected

295 and *wAlbB*-infected females, plotted separately for each replicate.

296

297

298 Females from two replicates of the *Wolbachia* infection comparison were measured for

299 wing length (Figure 3). There was no significant effect of wing length on host-seeking speed,

300 measured by capture interval ( $F_{14,251} = 0.708$ ,  $P = 0.766$ ). Females landing within the first

301 three minutes ( $2.81 \pm 0.02$  mm,  $n = 102$ ) did not differ in size from females collected after

302 42 minutes had elapsed ( $2.80 \pm 0.03$  mm,  $n = 57$ ), suggesting no difference in size between

303 fast host-seeking females and non-host-seekers ( $F_{1,80} = 1.311$ ,  $P = 0.256$ ).

304

305

306 **Figure 3.** Wing lengths of female *A. aegypti* collected during two replicates of the *Wolbachia*

307 infection host-seeking experiment. Points represent wing lengths of individual females

308 collected across each 3-minute interval of the experiment. Wing lengths of females

309 captured after 42 minutes had elapsed were also included.

310

311

312 *Laboratory adaptation comparison*

313

314 In comparisons of laboratory and field *A. aegypti* females, approximately 60% of the  
315 released mosquitoes were caught over the duration of the experiments. Cumulative landing  
316 proportions did not differ significantly between field and laboratory populations when  
317 combined across replicates (log-rank:  $\chi^2 = 2.275$ ,  $df = 1$ ,  $P = 0.131$ , Figure 4a). The average  
318 time to landing did not differ significantly between field (mean  $\pm$  SE:  $12.3 \pm 1.1$  minutes) and  
319 laboratory ( $10.5 \pm 1.3$  minutes) females (two-way ANOVA:  $F_{1,5} = 2.346$ ,  $P = 0.186$ , Figure 4b),  
320 with no significant effect of replicate ( $F_{5,5} = 2.876$ ,  $P = 0.136$ ). Furthermore, the total  
321 proportion of females landing did not differ between field and laboratory females ( $F_{1,5} =$   
322  $0.745$ ,  $P = 0.428$ , Figure 4c), with no significant effect of replicate ( $F_{5,5} = 4.647$ ,  $P = 0.059$ ),  
323 suggesting that laboratory maintenance does not affect host-seeking ability.

324

325

326 **Figure 4.** Host-seeking ability of field and laboratory *A. aegypti* females in a semi-field cage.  
327 (a) Cumulative landing proportions of females on human experimenters across all replicates.  
328 Lines represent means and error bars represent standard errors. (b-c) Comparisons of  
329 average time to landing (b) and proportion landing (c) between field and laboratory females,  
330 plotted separately for each replicate.

331

332

333

334 **Discussion**

335

336 Suppressing the transmission of dengue and other arboviruses by releasing *Wolbachia*-  
337 infected mosquitoes is becoming increasingly popular, with releases taking place in at least  
338 12 countries (<https://www.worldmosquitoprogram.org/>;  
339 [https://www.nea.gov.sg/corporate-functions/resources/research/wolbachia-aedes-  
340 mosquito-suppression-strategy/project-wolbachia-singapore](https://www.nea.gov.sg/corporate-functions/resources/research/wolbachia-aedes-mosquito-suppression-strategy/project-wolbachia-singapore);  
341 <https://www.imr.gov.my/wolbachia/>). For releases to succeed, the strain intended for  
342 deployment needs to have comparable fitness to wild-type mosquitoes, which should be  
343 tested prior to large-scale field release. The semi-field cage setting is widely used as an  
344 intermediate step between laboratory studies and open field releases.<sup>63, 64, 65</sup> Semi-field  
345 experiments have been used to test the mating success and invasive ability of *Wolbachia*  
346 infections<sup>12, 66, 67</sup> and for evaluating the efficacy of novel mosquito traps and pesticides.<sup>65, 68,</sup>  
347 <sup>69</sup> But while host-seeking is critical for the success of *Wolbachia* replacement programs, the  
348 strains used in field releases including *wMel* and *wAlbB* have not been evaluated for their  
349 effects on host-seeking ability in a realistic way.

350

351 We compared the host-seeking ability of female *A. aegypti* with different *Wolbachia*  
352 infection types and from laboratory and field origins in a semi-field cage. Our method was  
353 similar to the method developed by McMeniman, et al.<sup>70</sup> In their study, the host-seeking  
354 ability of wild-type and *Gr3* mutant females lacking a response to CO<sub>2</sub> was compared by  
355 releasing mosquitoes in the middle of the cage and leaving them to disperse naturally for 5  
356 hours before the experiment. In our design, female mosquitoes were released  
357 simultaneously at a single release point fifteen meters away from the experimenters, thus  
358 standardizing the distance over which host-seeking is tested and allowing mosquitoes to

359 combine their flight ability with the detection of olfactory, visual and thermal queues to  
360 locate and land on experimenters. This is the first time that a semi-field approach has been  
361 used to evaluate the host-seeking ability of mosquitoes with *Wolbachia* strains intended for  
362 field deployment.

363

364 We found no significant differences between *A. aegypti* with different *Wolbachia* infection  
365 types on host-seeking ability in our experiments. Females with the *wMel* and *wAlbB* strains  
366 should therefore not be at a disadvantage in terms of host-seeking if released into the field.

367 Although a study with a Puerto Rican *A. aegypti* population indicated that laboratory  
368 maintenance altered attraction to human odors,<sup>45</sup> no significant differences were found in  
369 overall host-seeking between laboratory and field populations in our semi-field  
370 experiments. Therefore, our laboratory maintenance protocol<sup>46</sup> should not lead to  
371 compromised host-seeking ability in the field, though other factors that can coincide with  
372 laboratory maintenance such as inbreeding may reduce fitness.<sup>71</sup> Different rearing  
373 procedures, such as the use of membrane feeders, non-human blood or small cages may  
374 also affect host-seeking ability if adaptation occurs.

375

376 In the absence of molecular tools, visual marking is needed to distinguish between  
377 populations in the same experiment. However, overapplication of powder may affect  
378 longevity and behavioral responses, with effects depending on the method and the color  
379 used for marking.<sup>72, 73, 74</sup> Although the two sets of experiments were conducted at different  
380 times, no significant differences were found between marked and unmarked uninfected  
381 laboratory females in terms of average arrival time (One-way ANOVA:  $F_{1,10} = 0.388$ ,  $P =$



382 0.547) and proportion landing ( $F_{1,10} = 0.387$ ,  $P = 0.548$ ), which suggests that the minimal  
383 amount of fluorescent powder used for marking does not affect host-seeking ability.

384

385 We also ran experiments with *wMel*, *wAlbB*-infected and uninfected *A. aegypti* females that  
386 were 20 d old and found no significant differences between populations (Supplementary  
387 Figure 4). Although mosquitoes of different ages were not compared in the same  
388 experiment, we found that 20 d old females had slower average times to landing (Two-way  
389 ANOVA: ages:  $F_{1,24} = 8.567$ ,  $P = 0.007$ , colonies:  $F_{2,24} = 1.407$ ,  $P = 0.264$ ) but higher landing  
390 proportions (ages:  $F_{1,24} = 5.802$ ,  $P = 0.024$ , colonies:  $F_{2,24} = 0.461$ ,  $P = 0.636$ ) compared to 5 d  
391 old females by treating mosquito age and colony as fixed factors. This suggests that host-  
392 seeking ability may be influenced by mosquito age, but direct comparisons between ages in  
393 the same experiment are needed to confirm this finding.

394

395 Many factors can influence mosquito attraction to humans including environmental  
396 temperature and humidity, in addition to the  $CO_2$ , skin emanations, body heat and moisture  
397 of the host.<sup>75, 76, 77</sup> While all mosquitoes in each experiment were reared under the same  
398 conditions and were a similar age, we observed substantial differences in average times to  
399 landing and landing proportions between replicates (Supplementary Tables 2 and 3). We  
400 found no effect of temperature or the time of releases (Supplementary Table 1) according  
401 to Spearman's rank correlation ( $P > 0.05$ ), suggesting that temperature and time of day did  
402 not substantially influence host-seeking. We also ran a power analysis using an online  
403 calculator ([http://powerandsamplesize.com/Calculators/Compare-2-Means/2-Sample-  
404 Equality](http://powerandsamplesize.com/Calculators/Compare-2-Means/2-Sample-Equality)) with a 80% power test using the average times and standard deviations of  
405 *Wolbachia*-infected and uninfected colonies. For 20% differences in our studies (7.5 minutes

406 for *wMel* or *wAlbB*-infected *A. aegypti* while 9.5 minutes for uninfected *A. aegypti*), at least  
407 15 replicates are needed to detect an effect, while a difference of 30% could be detected  
408 with six replicates.

409

410 In addition to studying the host-seeking ability of females, it may be possible to extend this  
411 method to male mosquitos. For SIT, IIT and RIDL approaches, testing the competitiveness of  
412 males before the release is essential.<sup>27</sup> A previous semi-field cage study showed that  
413 *Wolbachia* infection does not reduce the competitiveness of *A. aegypti* males.<sup>67</sup> However, in  
414 nature, adult female densities will not be as high as in semi-field cage tests; males will  
415 typically locate and fly around a human host first before detecting female flight tones and  
416 initiating courtship behaviour.<sup>78, 79, 80</sup> In a pilot experiment where we released males into the  
417 semi-field cage, we found that *A. aegypti* males exhibited a similar host-seeking response to  
418 females (Supplementary Figure 5), but this requires further testing.

419

420 In conclusion, we have developed a method to test the host-seeking ability of female *A.*  
421 *aegypti* populations under semi-field conditions. While changes in host-seeking behavior  
422 due to *Wolbachia* infections and laboratory adaptation are apparent from some laboratory  
423 studies, it is important to test host-seeking in a way that reflects natural conditions.  
424 Comparisons of host-seeking ability using this approach will be informative when evaluating  
425 mosquito strains for field release. This method can also be used to compare other factors  
426 such as age and rearing conditions which can help to better understand the host-seeking  
427 behavior of female mosquitoes.

428

429 **Acknowledgements**

430 We thank Qiong Yang and Ashley Callahan of the Pest and Environmental Adaptation  
431 Research Group for LightCycler technical assistance and Edward Tsyrlin for helping with  
432 taking mosquito photos. We also thank Chris Paton, Michael Townsend and Kyran Staunton  
433 in James Cook University for collecting field population, providing space and facility support  
434 for mosquito rearing and semi-field cage experiments.

435

#### 436 **Financial support**

437 AAH was supported by the National Health and Medical Research Council (1132412,  
438 1118640, [www.nhmrc.gov.au](http://www.nhmrc.gov.au)) and the Wellcome Trust (108508, [wellcome.ac.uk](http://wellcome.ac.uk)). The  
439 funders had no role in study design, data collection and analysis, decision to publish, or  
440 preparation of the manuscript.

441

#### 442 **Disclosures**

443 The authors declare that no conflicts of interest exist.

444

#### 445 **Current addresses**

446 As per the author list, except for Scott Ritchie:

447 Scott Ritchie

448 World Mosquito Program

449 Institute of Vector Borne Disease

450 Monash University

451 Clayton 3800 Vic

452 Australia

453

454

455 **References**

456

- 457 1. Wilder-Smith A, Gubler DJ, Weaver SC, Monath TP, Heymann DL, Scott TW, 2017.  
458 Epidemic arboviral diseases: priorities for research and public health. *Lancet Infect*  
459 *Dis* 17: e101-e106.
- 460 2. Gould EA, Higgs S, 2009. Impact of climate change and other factors on emerging  
461 arbovirus diseases. *Trans R Soc Trop Med Hyg* 103: 109-121.
- 462 3. Reiter P, 2001. Climate change and mosquito-borne disease. *Environ Health Perspect*  
463 109: 141-161.
- 464 4. Bhatt S, Gething PW, Brady OJ, Messina JP, Farlow AW, Moyes CL, Drake JM,  
465 Brownstein JS, Hoen AG, Sankoh O, 2013. The global distribution and burden of  
466 dengue. *Nature* 496: 504.
- 467 5. Gubler DJ, 2002. The global emergence/resurgence of arboviral diseases as public  
468 health problems. *Med Res Arch* 33: 330-342.
- 469 6. Huang Y-J, Higgs S, Vanlandingham D, 2017. Biological control strategies for  
470 mosquito vectors of arboviruses. *Insects* 8: 21.
- 471 7. Brogdon WG, McAllister JC, 1998. Insecticide resistance and vector control. *J Emerg*  
472 *Infect Dis* 4: 605.
- 473 8. Moyes CL, Vontas J, Martins AJ, Ng LC, Koou SY, Dusfour I, Raghavendra K, Pinto J,  
474 Corbel V, David J-P, 2017. Contemporary status of insecticide resistance in the major  
475 *Aedes* vectors of arboviruses infecting humans. *PLoS Negl Trop Dis* 11: e0005625.
- 476 9. Benedict MQ, Robinson AS, 2003. The first releases of transgenic mosquitoes: an  
477 argument for the sterile insect technique. *Trends Parasitol* 19: 349-355.
- 478 10. Mains JW, Brelsfoard CL, Rose RI, Dobson SL, 2016. Female adult *Aedes albopictus*  
479 suppression by *Wolbachia*-infected male mosquitoes. *Sci Rep* 6: 33846.
- 480 11. Harris AF, McKemey AR, Nimmo D, Curtis Z, Black I, Morgan SA, Oviedo MN, Lacroix  
481 R, Naish N, Morrison NI, 2012. Successful suppression of a field mosquito population  
482 by sustained release of engineered male mosquitoes. *Nat Biotechnol* 30: 828.
- 483 12. Walker T, Johnson PH, Moreira LA, Iturbe-Ormaetxe I, Frentiu FD, McMeniman CJ,  
484 Leong YS, Dong Y, Axford J, Kriesner P, Lloyd AL, Ritchie SA, O'Neill SL, Hoffmann AA,  
485 2011. The *wMel Wolbachia* strain blocks dengue and invades caged *Aedes aegypti*  
486 populations. *Nature* 476: 450-U101.
- 487 13. Ant TH, Herd CS, Geoghegan V, Hoffmann AA, Sinkins SP, 2018. The *Wolbachia* strain  
488 *wAu* provides highly efficient virus transmission blocking in *Aedes aegypti*. *PLoS*  
489 *Pathog* 14: e1006815.
- 490 14. Dobson SL, Fox CW, Jiggins FM, 2002. The effect of *Wolbachia*-induced cytoplasmic  
491 incompatibility on host population size in natural and manipulated systems. *Proc R*  
492 *Soc Lond B Biol Sci* 269: 437-445.
- 493 15. Brownlie JC, Cass BN, Riegler M, Witsenburg JJ, Iturbe-Ormaetxe I, McGraw EA,  
494 O'Neill SL, 2009. Evidence for metabolic provisioning by a common invertebrate  
495 endosymbiont, *Wolbachia pipientis*, during periods of nutritional stress. *PLoS Pathog*  
496 5: e1000368.

- 497 16. Moreira LA, Iturbe-Ormaetxe I, Jeffery JA, Lu G, Pyke AT, Hedges LM, Rocha BC, Hall-  
498 Mendelin S, Day A, Riegler M, 2009. A *Wolbachia* symbiont in *Aedes aegypti* limits  
499 infection with dengue, Chikungunya, and Plasmodium. Cell 139: 1268-1278.
- 500 17. Hoffmann AA, Montgomery B, Popovici J, Iturbe-Ormaetxe I, Johnson P, Muzzi F,  
501 Greenfield M, Durkan M, Leong Y, Dong Y, 2011. Successful establishment of  
502 *Wolbachia* in *Aedes* populations to suppress dengue transmission. Nature 476: 454.
- 503 18. O'Neill SL, Ryan PA, Turley AP, Wilson G, Retzki K, Iturbe-Ormaetxe I, Dong Y, Kenny  
504 N, Paton CJ, Ritchie SA, 2018. Scaled deployment of *Wolbachia* to protect the  
505 community from dengue and other *Aedes* transmitted arboviruses. Gates Open Res 2.
- 506 19. Ritchie SA, 2018. *Wolbachia* and the near cessation of dengue outbreaks in Northern  
507 Australia despite continued dengue importations via travellers. J Travel Med 25:  
508 tay084.
- 509 20. Benedict M, D'Abbs P, Dobson S, Gottlieb M, Harrington L, Higgs S, James A, James S,  
510 Knols B, Lavery J, 2008. Guidance for contained field trials of vector mosquitoes  
511 engineered to contain a gene drive system: recommendations of a scientific working  
512 group. Vector Borne Zoonotic Dis 8: 127-166.
- 513 21. de Azambuja Garcia G, Sylvestre G, Aguiar R, da Costa GB, Martins AJ, Lima JBP,  
514 Petersen MT, Lourenço-de-Oliveira R, Shadbolt MF, Rašić G, 2019. Matching the  
515 genetics of released and local *Aedes aegypti* populations is critical to assure  
516 *Wolbachia* invasion. PLoS Negl Trop Dis 13: e0007023.
- 517 22. McMeniman CJ, Lane RV, Cass BN, Fong AWC, Sidhu M, Wang Y-F, O'Neill SL, 2009.  
518 Stable Introduction of a Life-Shortening *Wolbachia* Infection into the Mosquito  
519 *Aedes aegypti*. Science 323: 141-144.
- 520 23. Yeap HL, Mee P, Walker T, Weeks AR, O'Neill SL, Johnson P, Ritchie SA, Richardson  
521 KM, Doig C, Endersby NM, Hoffmann AA, 2010. Dynamics of the "Popcorn"  
522 *Wolbachia* Infection in Outbred *Aedes aegypti* Informs Prospects for Mosquito  
523 Vector Control. Genetics 187: 583-595.
- 524 24. Ross PA, Endersby NM, Hoffmann AA, 2016. Costs of three *Wolbachia* infections on  
525 the survival of *Aedes aegypti* larvae under starvation conditions. PLoS Negl Trop Dis  
526 10: e0004320.
- 527 25. Hancock PA, White VL, Callahan AG, Godfray CH, Hoffmann AA, Ritchie SA, 2016.  
528 Density-dependent population dynamics in *Aedes aegypti* slow the spread of wMel  
529 *Wolbachia*. J Appl Ecol 53: 785-793.
- 530 26. Hu L, Tang M, Wu Z, Xi Z, Yu J, 2019. The threshold infection level for *Wolbachia*  
531 invasion in random environments. J Differ Equ 266: 4377-4393.
- 532 27. Chambers EW, Hapairai L, Peel BA, Bossin H, Dobson SL, 2011. Male mating  
533 competitiveness of a *Wolbachia*-introgressed *Aedes polynesiensis* strain under semi-  
534 field conditions. PLoS Negl Trop Dis 5: e1271.
- 535 28. Hoffmann AA, Ross PA, 2018. Rates and Patterns of Laboratory Adaptation in (Mostly)  
536 Insects. J Econ Entomol 111: 501-509.
- 537 29. Maclean H, Kristensen T, Sørensen J, Overgaard J, 2018. Laboratory maintenance  
538 does not alter ecological and physiological patterns among species: A *Drosophila*  
539 case study. J Econ Entomol 31: 530-542.
- 540 30. Grossman MK, Uc-Puc V, Rodriguez J, Cutler DJ, Morran LT, Manrique-Saide P,  
541 Vazquez-Prokopec GM, 2018. Restoration of pyrethroid susceptibility in a highly  
542 resistant *Aedes aegypti* population. Biol Lett 14: 20180022.

- 543 31. Kristensen TN, Hoffmann AA, Overgaard J, Sorensen JG, Hallas R, Loeschcke V, 2008.  
544 Costs and benefits of cold acclimation in field-released *Drosophila*. Proc Natl Acad Sci  
545 U S A 105: 216-21.
- 546 32. Hoffmann AA, 2009. *Drosophila* and Selection in Nature: From Laboratory Fitness  
547 Components to Field Assessments. van der Werf J, Graser H-U, Frankham R, Gondro  
548 C, eds. Adaptation and Fitness in Animal Populations: Evolutionary and Breeding  
549 Perspectives on Genetic Resource Management. Dordrecht: Springer Netherlands,  
550 169-182.
- 551 33. Calisi RM, Bentley GE, 2009. Lab and field experiments: are they the same animal?  
552 Horm Behav 56: 1-10.
- 553 34. de Valdez MRW, Nimmo D, Betz J, Gong H-F, James AA, Alphey L, Black WC, 2011.  
554 Genetic elimination of dengue vector mosquitoes. Proc Natl Acad Sci U S A 108:  
555 4772-4775.
- 556 35. Facchinelli L, Valerio L, Ramsey JM, Gould F, Walsh RK, Bond G, Robert MA, Lloyd AL,  
557 James AA, Alphey L, 2013. Field cage studies and progressive evaluation of  
558 genetically-engineered mosquitoes. PLoS Negl Trop Dis 7: e2001.
- 559 36. Ross PA, Ritchie SA, Axford JK, Hoffmann AA, 2019. Loss of cytoplasmic  
560 incompatibility in *Wolbachia*-infected *Aedes aegypti* under field conditions. PLoS  
561 Negl Trop Dis 13: e0007357.
- 562 37. Schmidt TL, Filipovic I, Hoffmann AA, Rasic G, 2018. Fine-scale landscape genomics  
563 helps explain the slow spatial spread of *Wolbachia* through the *Aedes aegypti*  
564 population in Cairns, Australia. Heredity (Edinb) 120: 386-395.
- 565 38. Turelli M, Barton NH, 2017. Deploying dengue-suppressing *Wolbachia*: robust  
566 models predict slow but effective spatial spread in *Aedes aegypti*. Theor Popul Biol  
567 115: 45-60.
- 568 39. Nguyen TH, Le Nguyen H, Nguyen TY, Vu SN, Tran ND, Le T, Vien QM, Bui T, Le HT,  
569 Kutcher S, 2015. Field evaluation of the establishment potential of wMelPop  
570 *Wolbachia* in Australia and Vietnam for dengue control. Parasit Vectors 8: 563.
- 571 40. Dekker T, Geier M, Cardé RT, 2005. Carbon dioxide instantly sensitizes female yellow  
572 fever mosquitoes to human skin odours. J Exp Biol 208: 2963-2972.
- 573 41. Cardé R, 2015. Multi-cue integration: how female mosquitoes locate a human host.  
574 Curr Biol 25: R793-R795.
- 575 42. van Breugel F, Riffell J, Fairhall A, Dickinson MH, 2015. Mosquitoes use vision to  
576 associate odor plumes with thermal targets. Curr Biol 25: 2123-2129.
- 577 43. Turley A, Smallegange R, Takken W, Zalucki M, O'Neill S, McGraw E, 2014. *Wolbachia*  
578 infection does not alter attraction of the mosquito *Aedes (Stegomyia) aegypti* to  
579 human odours. Med Vet Entomol 28: 457-460.
- 580 44. Ritchie SA, Johnson PH, Freeman AJ, Odell RG, Graham N, Dejong PA, Standfield GW,  
581 Sale RW, O'Neill SL, 2011. A secure semi-field system for the study of *Aedes aegypti*.  
582 PLoS Negl Trop Dis 5: e988.
- 583 45. Clark GG, Bernier UR, Allan SA, Kline DL, Golden FV, 2011. Changes in host-seeking  
584 behavior of Puerto Rican *Aedes aegypti* after colonization. J Med Entomol 48: 533-  
585 537.
- 586 46. Ross PA, Axford JK, Richardson KM, Endersby-Harshman NM, Hoffmann AA, 2017.  
587 Maintaining *Aedes aegypti* mosquitoes infected with *Wolbachia*. J Vis Exp.
- 588 47. Xi ZY, Khoo CCH, Dobson SL, 2005. *Wolbachia* establishment and invasion in an  
589 *Aedes aegypti* laboratory population. Science 310: 326-328.

- 590 48. Hoffmann AA, Iturbe-Ormaetxe I, Callahan AG, Phillips BL, Billington K, Axford JK,  
591 Montgomery B, Turley AP, O'Neill SL, 2014. Stability of the *wMel* *Wolbachia* Infection  
592 following Invasion into *Aedes aegypti* Populations. PLoS Negl Trop Dis 8.
- 593 49. Axford JK, Ross PA, Yeap HL, Callahan AG, Hoffmann AA, 2016. Fitness of *wAlbB*  
594 *Wolbachia* infection in *Aedes aegypti*: parameter estimates in an outcrossed  
595 background and potential for population invasion. Am J Trop Med Hyg 94: 507-516.
- 596 50. Ross PA, Wiwatanaratantabutr I, Axford JK, White VL, Endersby-Harshman NM,  
597 Hoffmann AA, 2017. *Wolbachia* infections in *Aedes aegypti* differ markedly in their  
598 response to cyclical heat stress. PLoS Pathog 13: e1006006.
- 599 51. Dittmer J, Alafndi A, Gabrieli P, 2019. Fat body-specific vitellogenin expression  
600 regulates host-seeking behaviour in the mosquito *Aedes albopictus*. PLoS Biol 17:  
601 e3000238.
- 602 52. Attardo GM, Hansen IA, Raikhel AS, 2005. Nutritional regulation of vitellogenesis in  
603 mosquitoes: implications for anautogeny. Insect Biochem Mol Biol 35: 661-675.
- 604 53. Yeap HL, Endersby NM, Johnson PH, Ritchie SA, Hoffmann AA, 2013. Body size and  
605 wing shape measurements as quality indicators of *Aedes aegypti* mosquitoes  
606 destined for field release. Am J Trop Med Hyg 89: 78-92.
- 607 54. Nasci RS, 1986. The size of emerging and host-seeking *Aedes aegypti* and the relation  
608 of size to blood-feeding success in the field. J Am Mosq Control Assoc 2: 61-2.
- 609 55. Briegel H, 1990. Metabolic relationship between female body size, reserves, and  
610 fecundity of *Aedes aegypti*. J Insect Physiol 36: 165-172.
- 611 56. Anderson LE, 1954. Hoyer's solution as a rapid permanent mounting medium for  
612 bryophytes. Bryologist 57: 242-244.
- 613 57. Lee SF, White VL, Weeks AR, Hoffmann AA, Endersby NM, 2012. High-throughput  
614 PCR assays to monitor *Wolbachia* infection in the dengue mosquito (*Aedes aegypti*)  
615 and *Drosophila simulans*. Appl Environ Microbiol: AEM. 00069-12.
- 616 58. Joubert DA, Walker T, Carrington LB, De Bruyne JT, Kien DHT, Hoang NLT, Chau NVV,  
617 Iturbe-Ormaetxe I, Simmons CP, O'Neill SL, 2016. Establishment of a *Wolbachia*  
618 superinfection in *Aedes aegypti* mosquitoes as a potential approach for future  
619 resistance management. PLoS Pathog 12: e1005434.
- 620 59. Zhou W, Rousset F, O'Neill S, 1998. Phylogeny and PCR-based classification of  
621 *Wolbachia* strains using *wsp* gene sequences. Proc R Soc Lond B Biol Sci 265: 509-515.
- 622 60. Hope RM, 2013. Rmisc: Ryan miscellaneous. R package version 1.
- 623 61. Wickham H, 2009. plyr: Tools for splitting, applying and combining data. R package  
624 version 0.1 9: 651.
- 625 62. Wickham H, 2016. ggplot2: elegant graphics for data analysis: Springer.
- 626 63. Madakacherry O, Lees RS, Gilles JRL, 2014. *Aedes albopictus* (Skuse) males in  
627 laboratory and semi-field cages: release ratios and mating competitiveness. Acta  
628 Trop 132: S124-S129.
- 629 64. Mancini MV, Spaccapelo R, Damiani C, Accoti A, Tallarita M, Petraglia E, Rossi P,  
630 Cappelli A, Capone A, Peruzzi G, 2016. Paratransgenesis to control malaria vectors: a  
631 semi-field pilot study. Parasit Vectors 9: 140.
- 632 65. Darbro JM, Johnson PH, Thomas MB, Ritchie SA, Kay BH, Ryan PA, 2012. Effects of  
633 *Beauveria bassiana* on survival, blood-feeding success, and fecundity of *Aedes*  
634 *aegypti* in laboratory and semi-field conditions. Am J Trop Med Hyg 86: 656-664.
- 635 66. Yeap HL, Axford JK, Popovici J, Endersby NM, Iturbe-Ormaetxe I, Ritchie SA,  
636 Hoffmann AA, 2014. Assessing quality of life-shortening *Wolbachia*-infected *Aedes*

- 637 *aegypti* mosquitoes in the field based on capture rates and morphometric  
638 assessments. Parasit Vectors 7: 58.
- 639 67. Segoli M, Hoffmann AA, Lloyd J, Omodei GJ, Ritchie SA, 2014. The effect of virus-  
640 blocking *Wolbachia* on male competitiveness of the dengue vector mosquito, *Aedes*  
641 *aegypti*. PLoS Negl Trop Dis 8: e3294.
- 642 68. de Lima Santos ND, da Silva Paixão K, Napoleão TH, Trindade PB, Pinto MR, Coelho  
643 LCBB, Eiras ÁE, Navarro DMdAF, Paiva PMG, 2014. Evaluation of *Moringa oleifera*  
644 seed lectin in traps for the capture of *Aedes aegypti* eggs and adults under semi-field  
645 conditions. Parasitol Res 113: 1837-1842.
- 646 69. Johnson BJ, Ritchie SA, 2016. The Siren's Song: Exploitation of female flight tones to  
647 passively capture male *Aedes aegypti* (Diptera: Culicidae). J Med Entomol 53: 245-8.
- 648 70. McMeniman CJ, Corfas RA, Matthews BJ, Ritchie SA, Vosshall LB, 2014. Multimodal  
649 integration of carbon dioxide and other sensory cues drives mosquito attraction to  
650 humans. Cell 156: 1060-71.
- 651 71. Ross PA, Endersby-Harshman NM, Hoffmann AA, 2019. A comprehensive assessment  
652 of inbreeding and laboratory adaptation in *Aedes aegypti* mosquitoes. Evol Appl 12:  
653 572-586.
- 654 72. Verhulst NO, Loonen JA, Takken W, 2013. Advances in methods for colour marking of  
655 mosquitoes. Parasit Vectors 6: 200.
- 656 73. Dickens BL, Brant HL, 2014. Effects of marking methods and fluorescent dusts on  
657 *Aedes aegypti* survival. Parasit Vectors 7: 65.
- 658 74. Hagler JR, Jackson CG, 2001. Methods for marking insects: current techniques and  
659 future prospects. Annu Rev Entomol 46: 511-543.
- 660 75. Zwiebel L, Takken W, 2004. Olfactory regulation of mosquito–host interactions.  
661 Insect Biochem Mol Biol 34: 645-652.
- 662 76. Takken W, 1991. The role of olfaction in host-seeking of mosquitoes: a review. Int J  
663 Trop Insect Sci 12: 287-295.
- 664 77. Bowen M, 1991. The sensory physiology of host-seeking behavior in mosquitoes.  
665 Annu Rev Entomol 36: 139-158.
- 666 78. Hartberg W, 1971. Observations on the mating behaviour of *Aedes aegypti* in nature.  
667 Bull World Health Organ 45: 847.
- 668 79. Stone CM, Tuten HC, Dobson SL, 2013. Determinants of male *Aedes aegypti* and  
669 *Aedes polynesiensis* (Diptera: Culicidae) response to sound: Efficacy and  
670 considerations for use of sound traps in the field. J Med Entomol 50: 723-730.
- 671 80. Cator LJ, Arthur BJ, Ponlawat A, Harrington LC, 2011. Behavioral observations and  
672 sound recordings of free-flight mating swarms of *Ae. aegypti* (Diptera: Culicidae) in  
673 Thailand. J Med Entomol 48: 941-946.
- 674



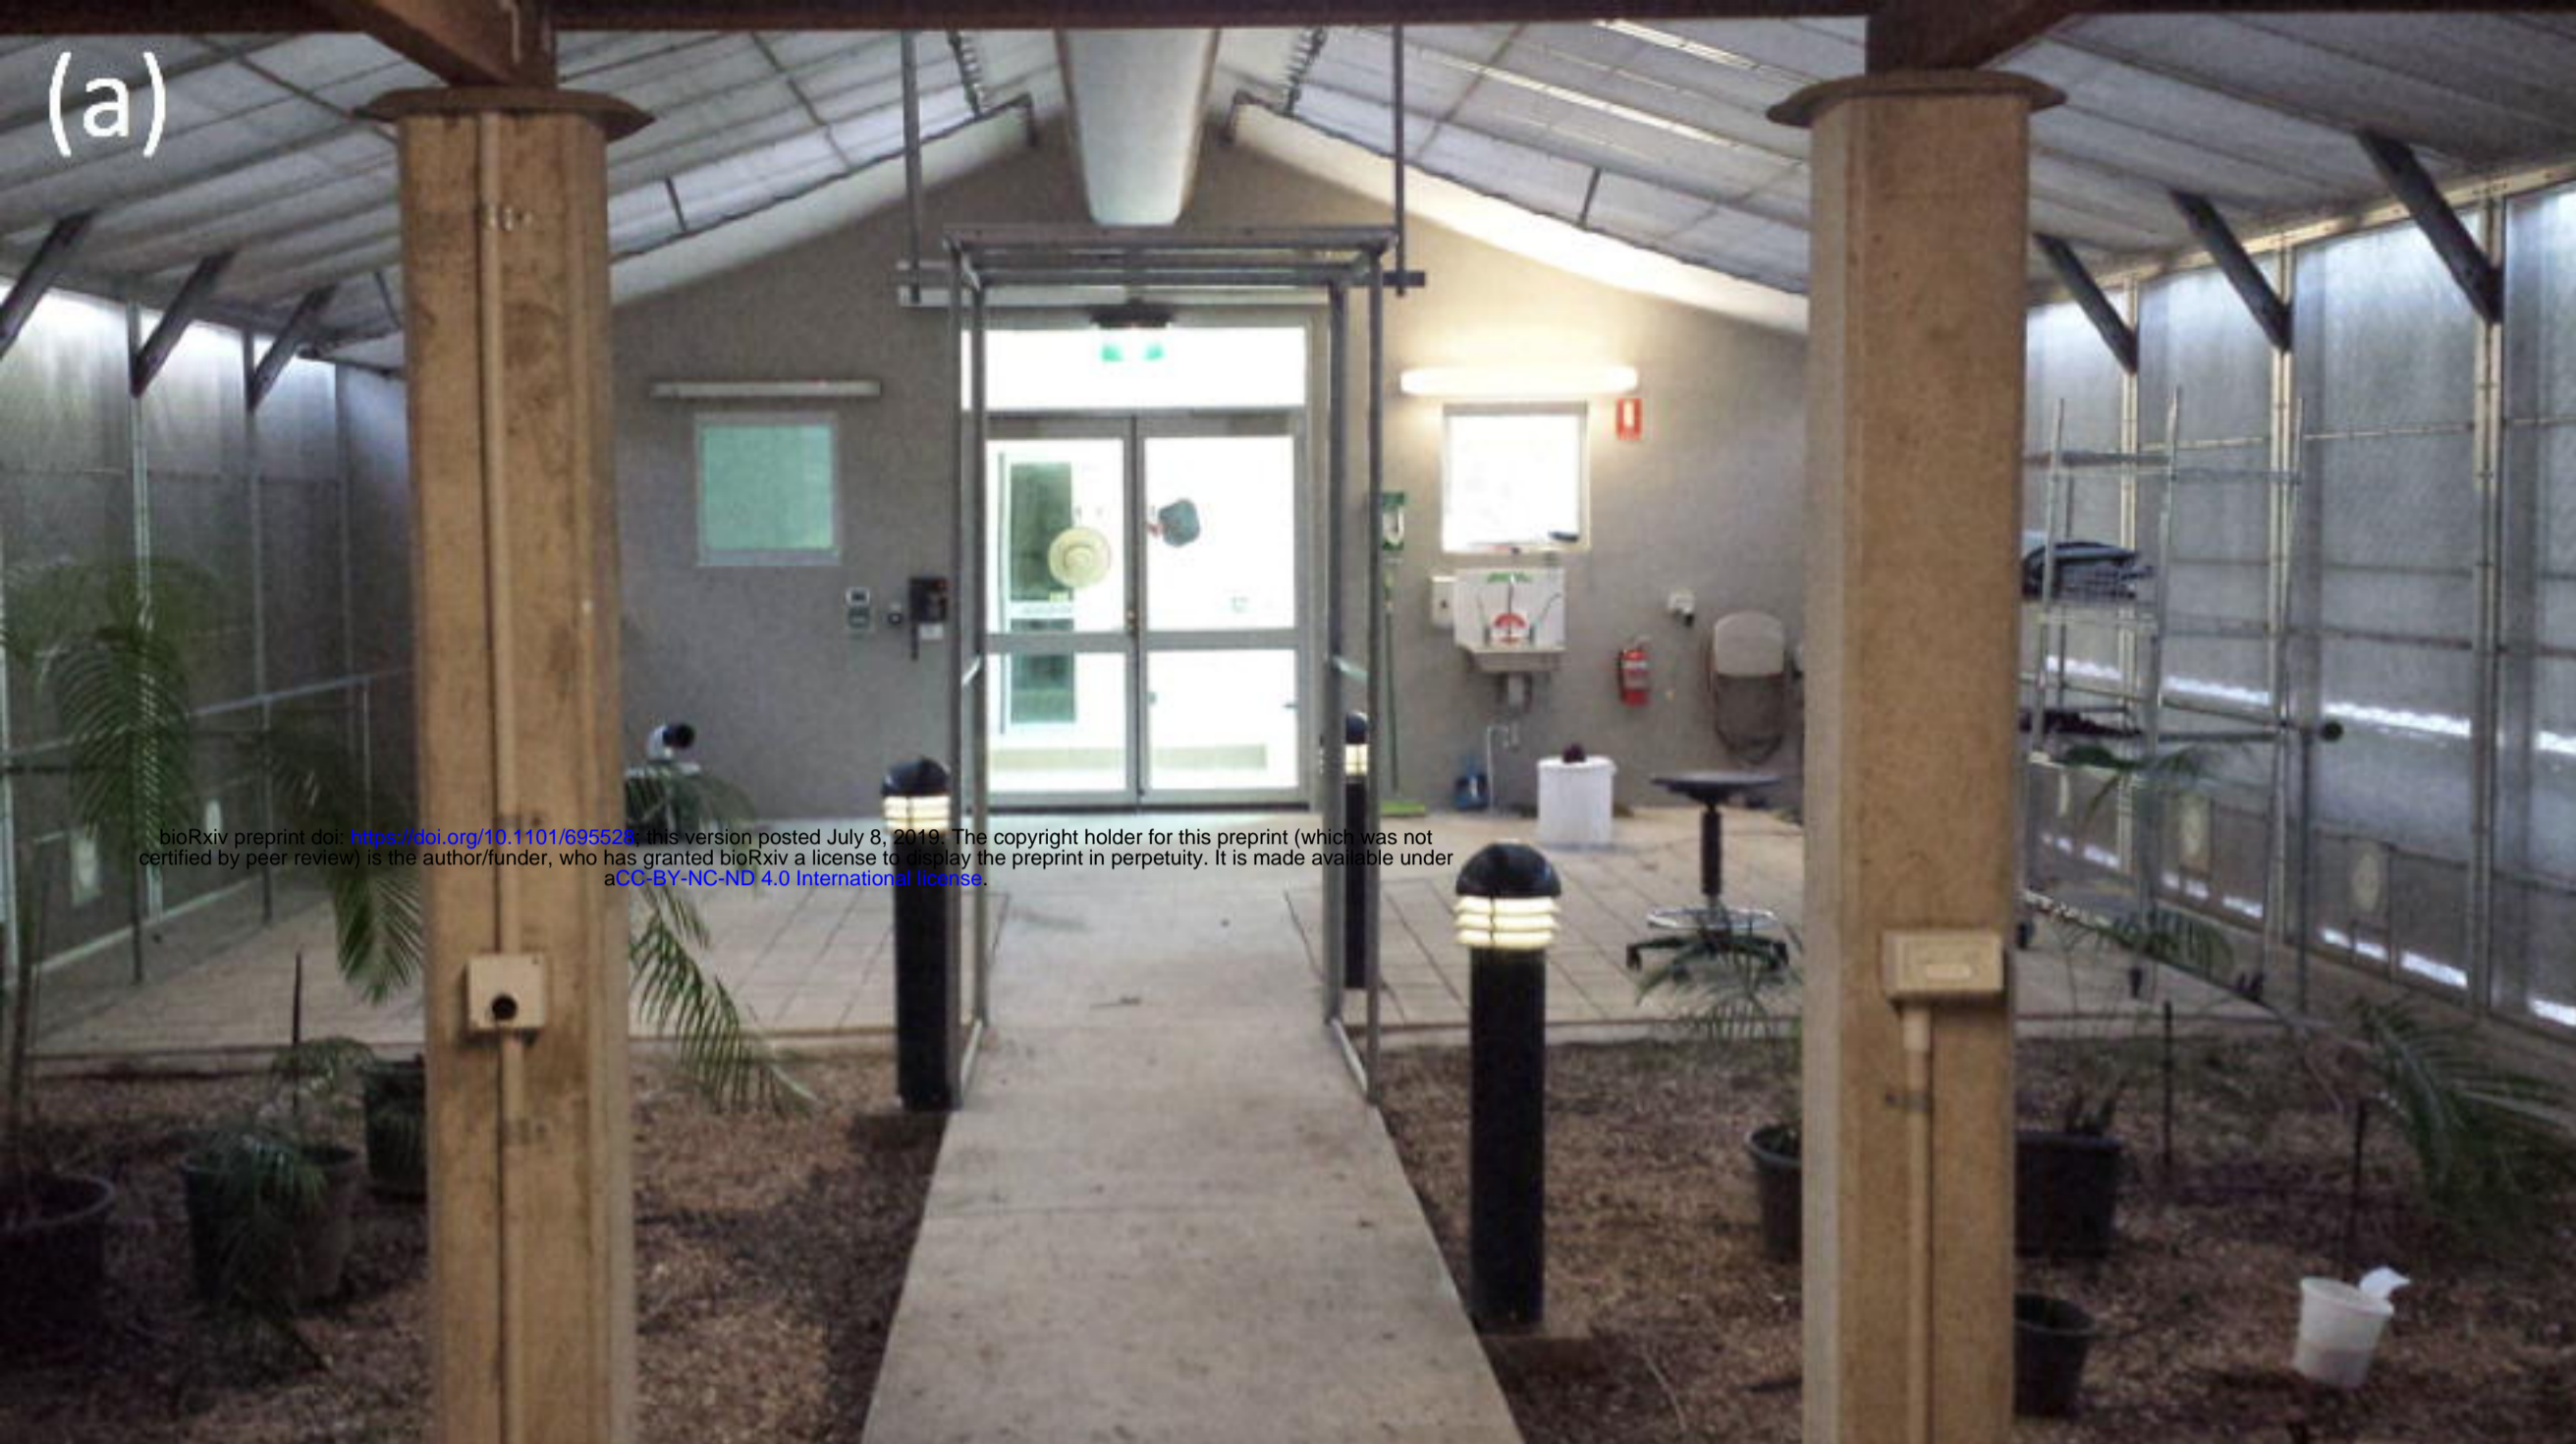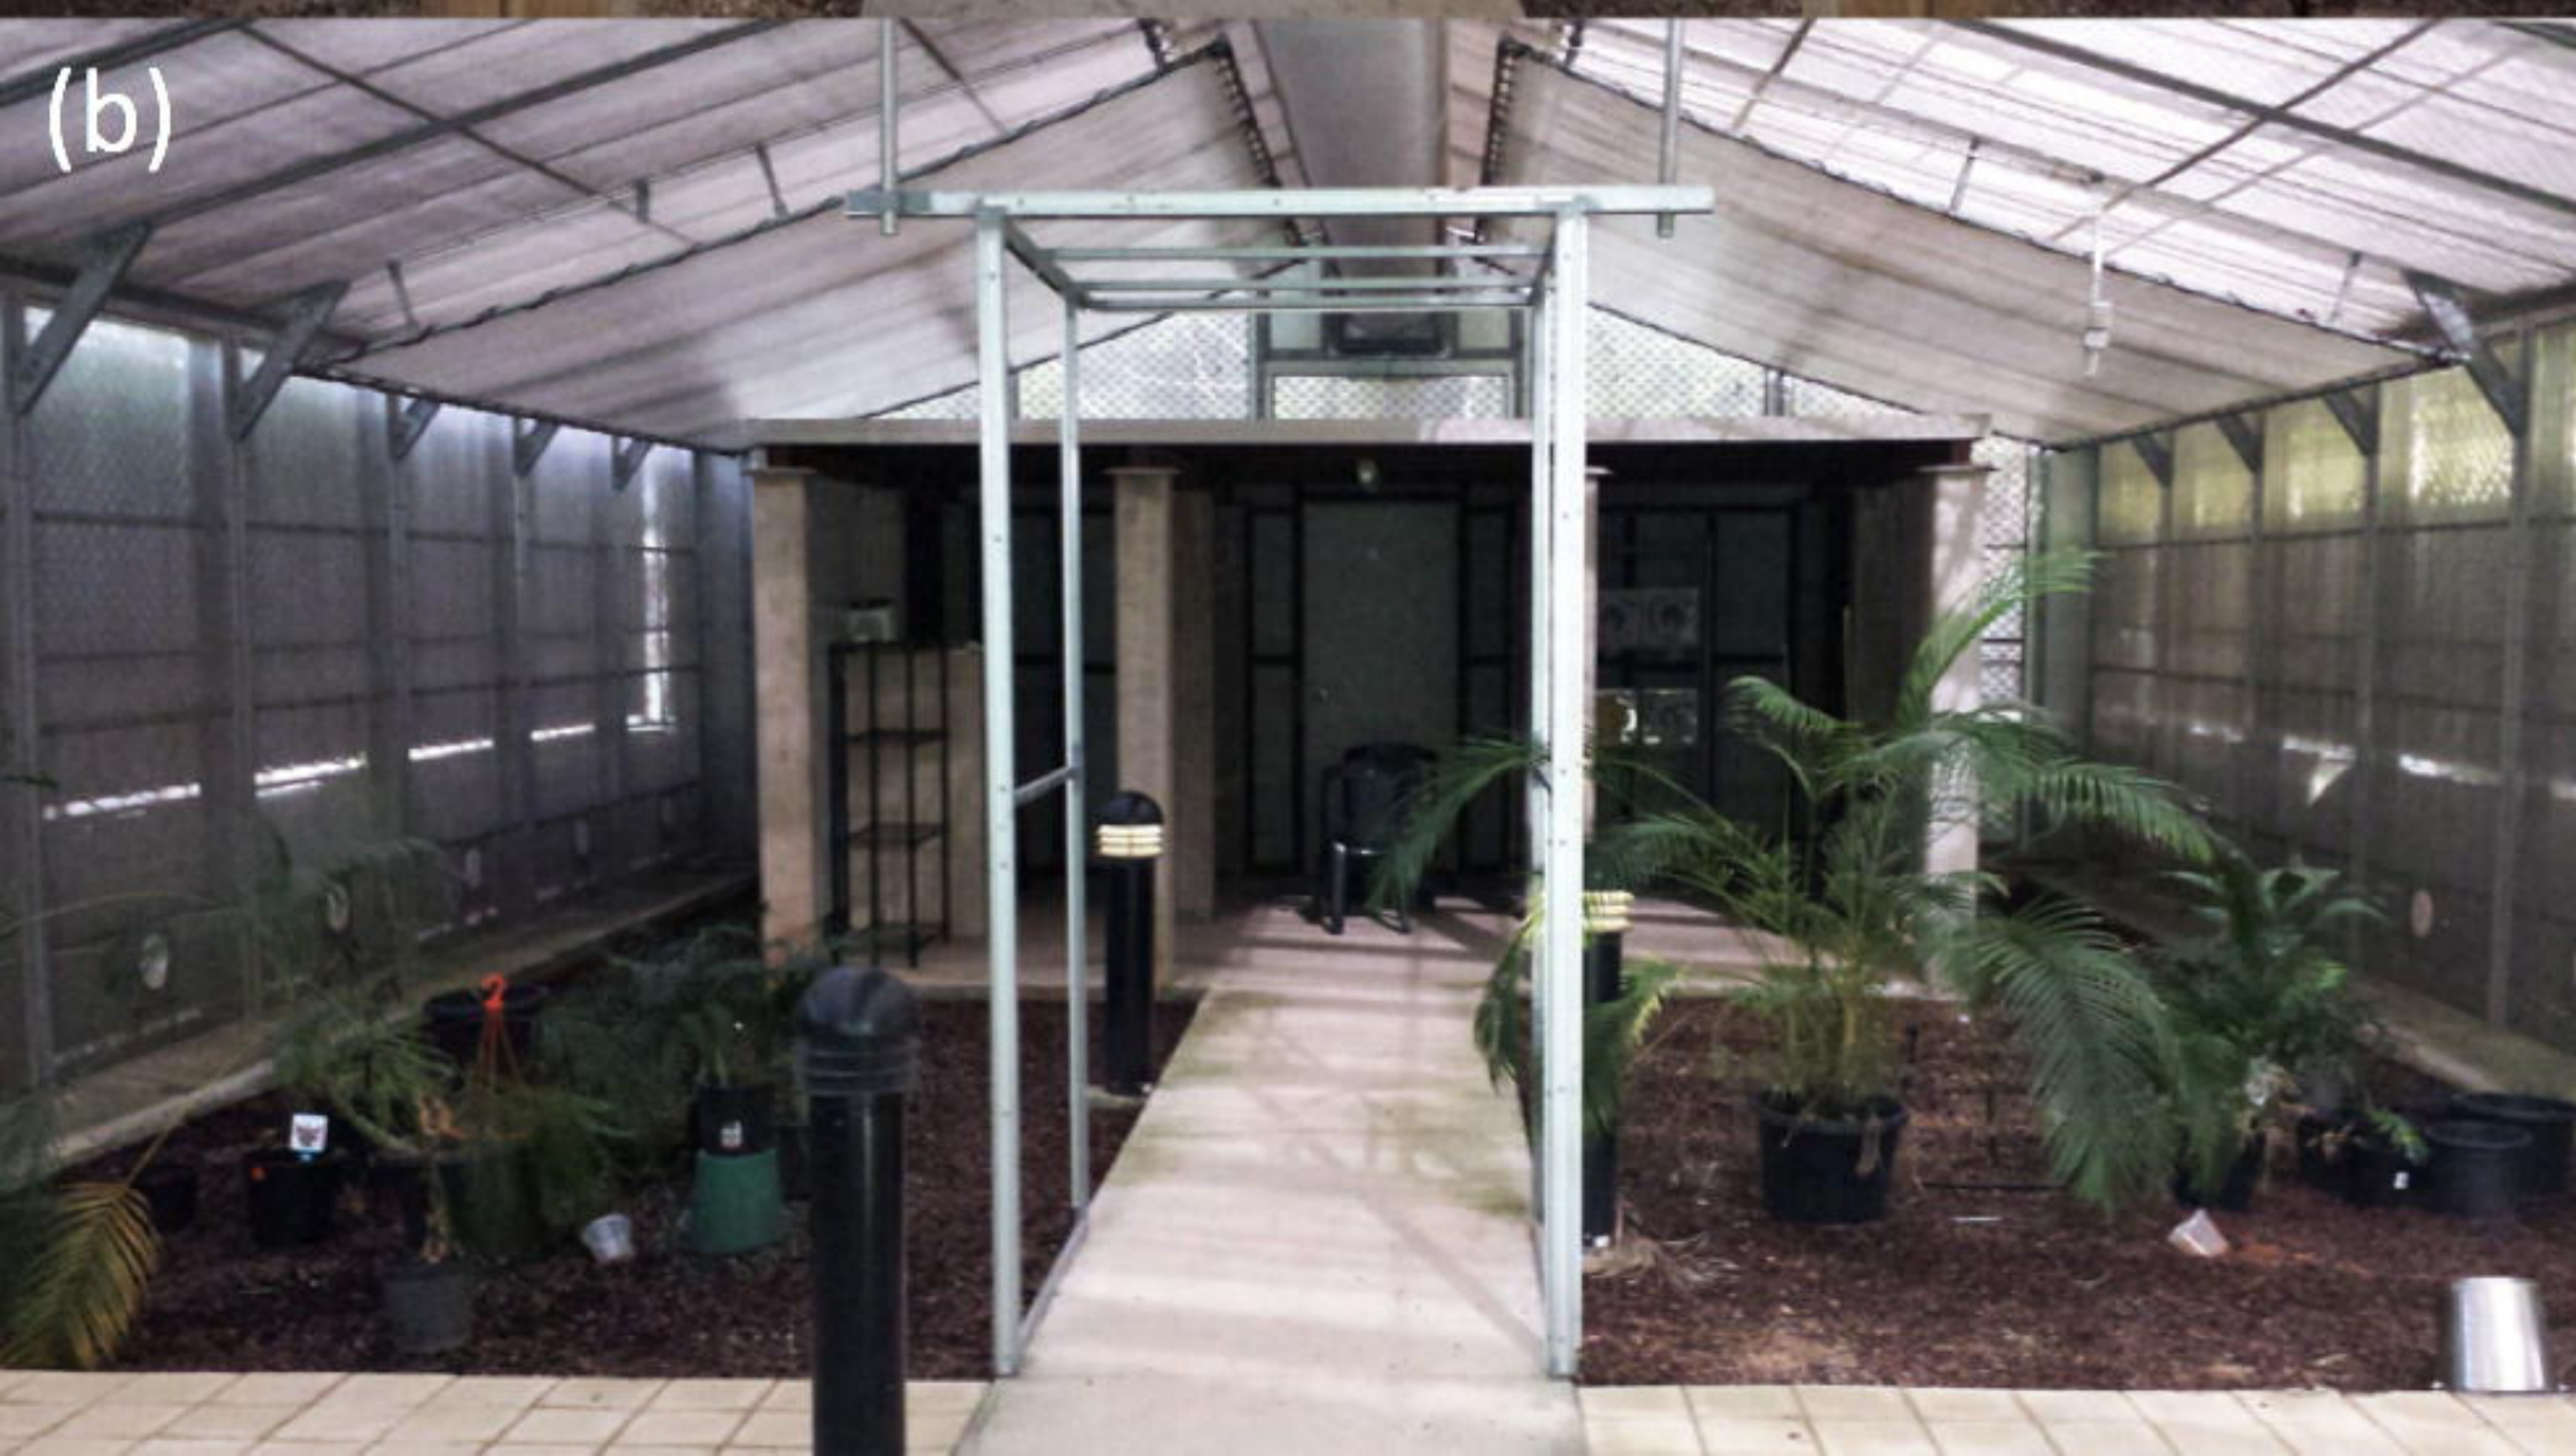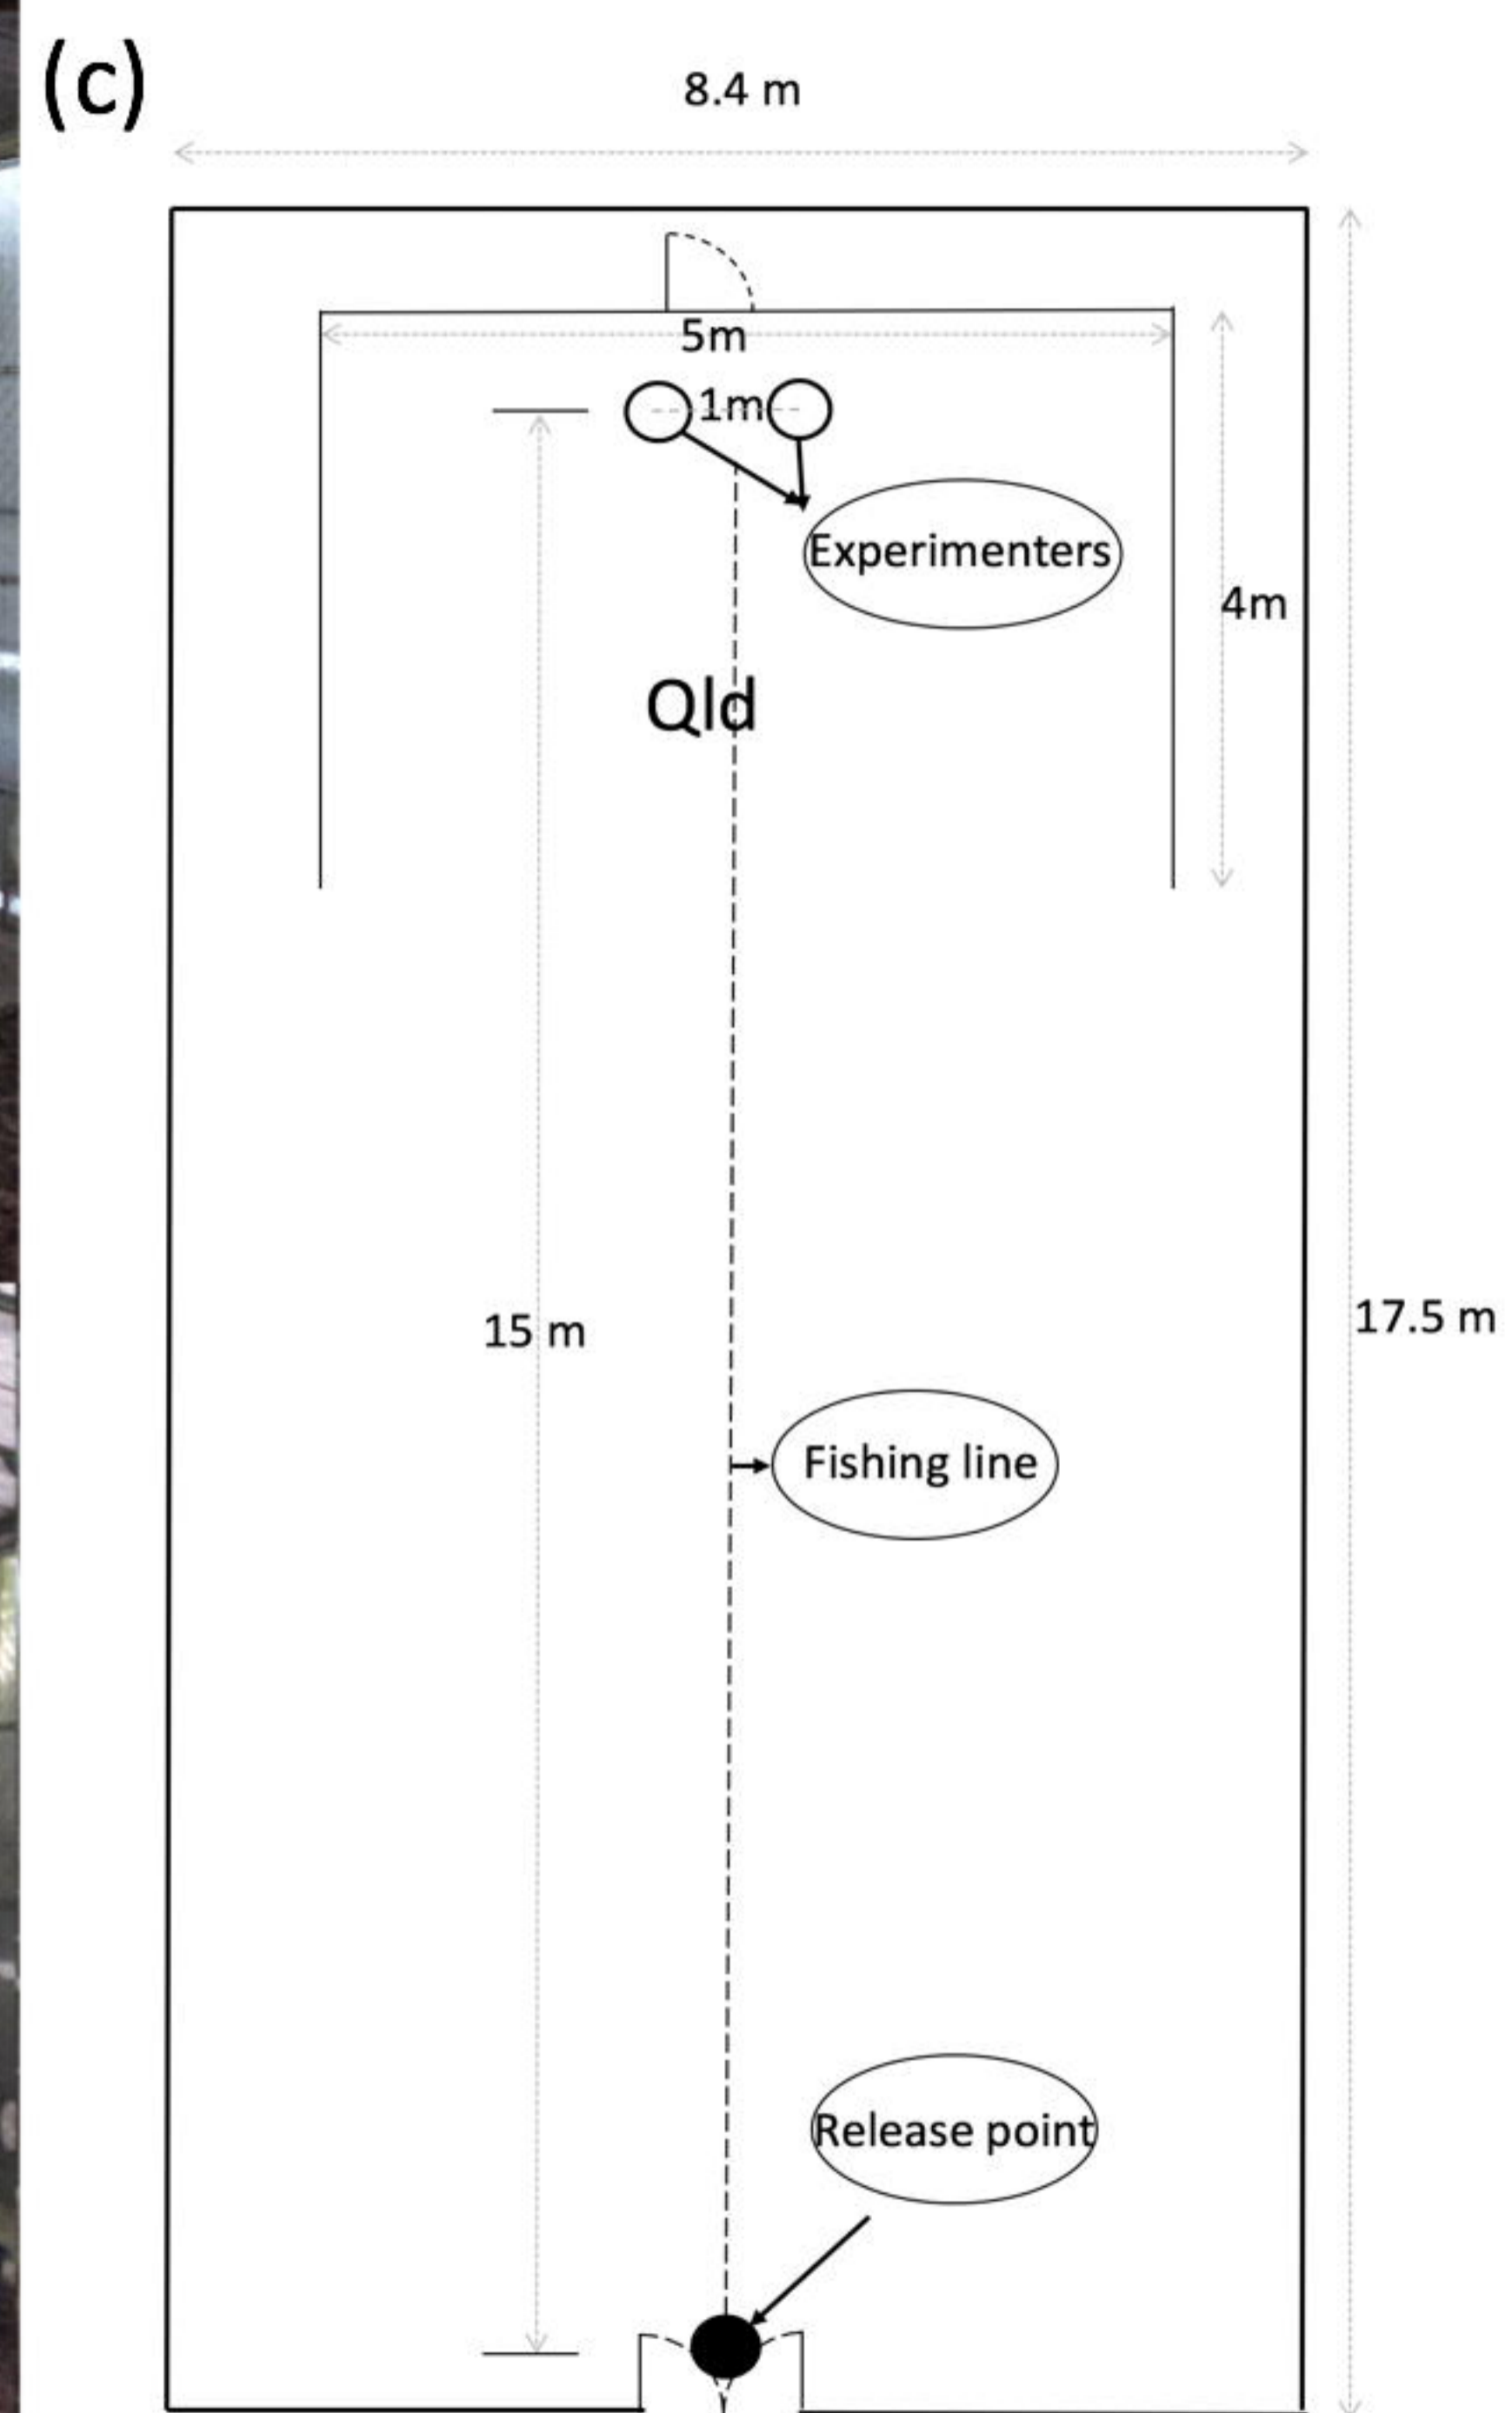



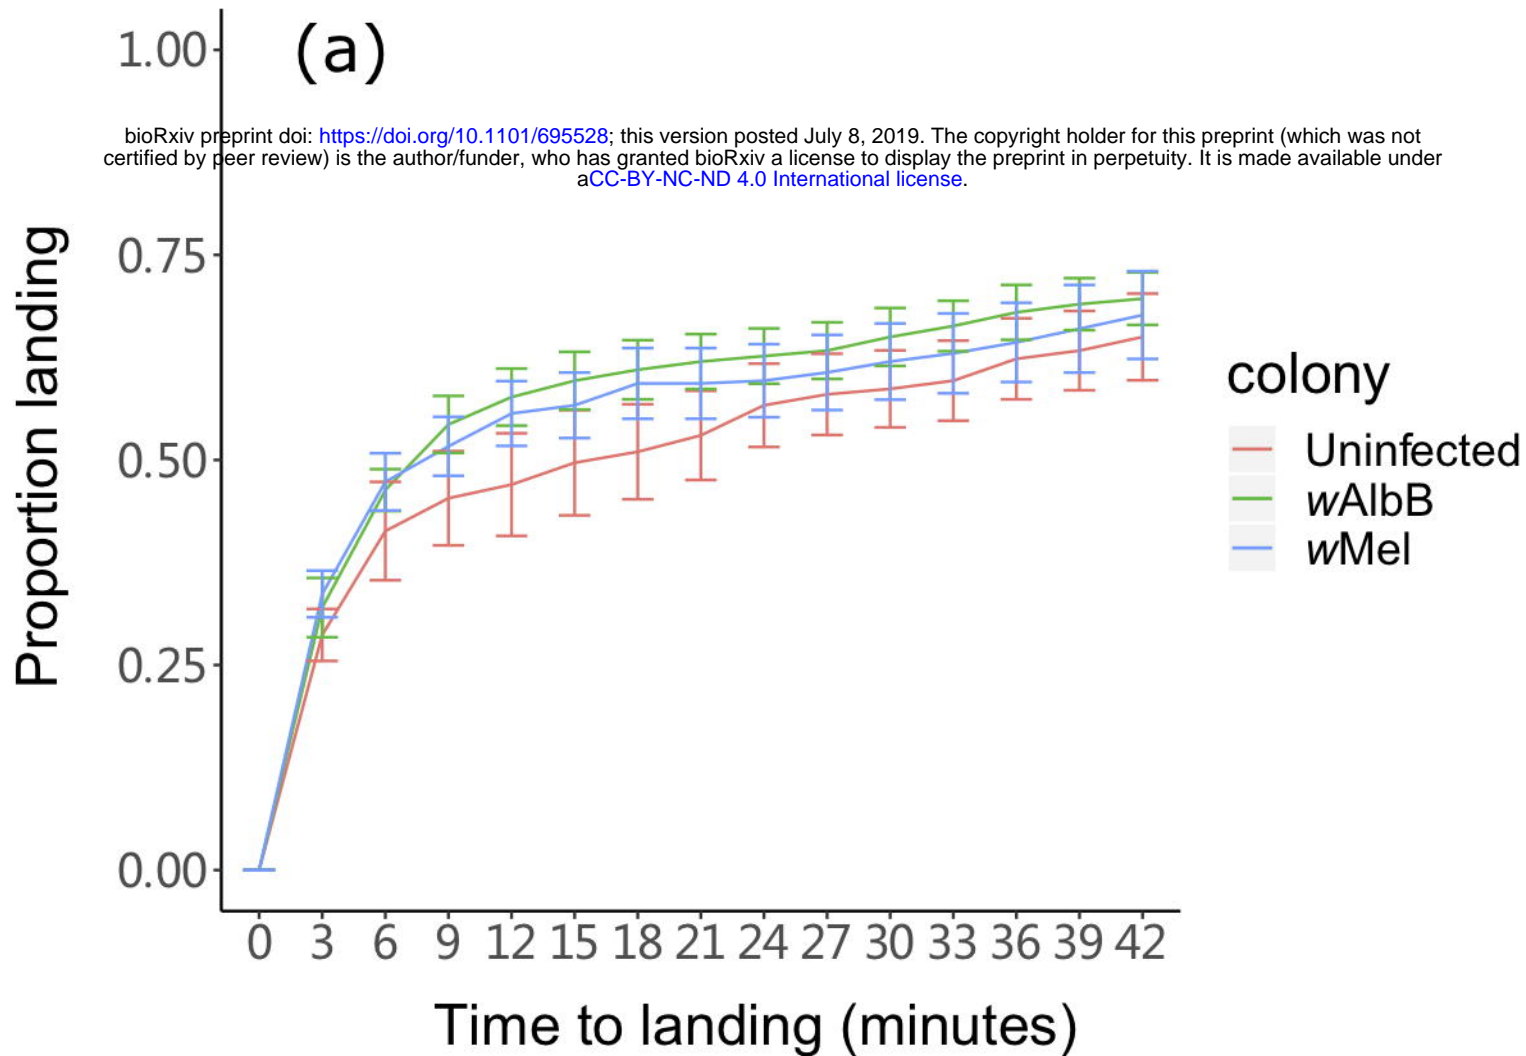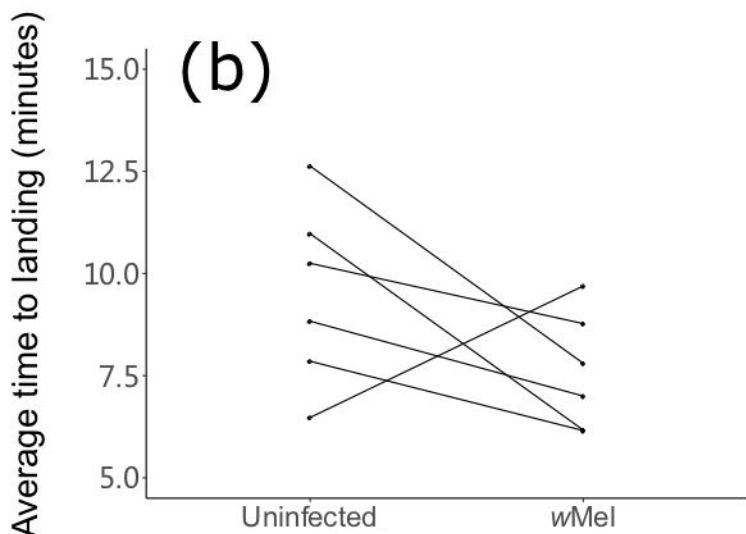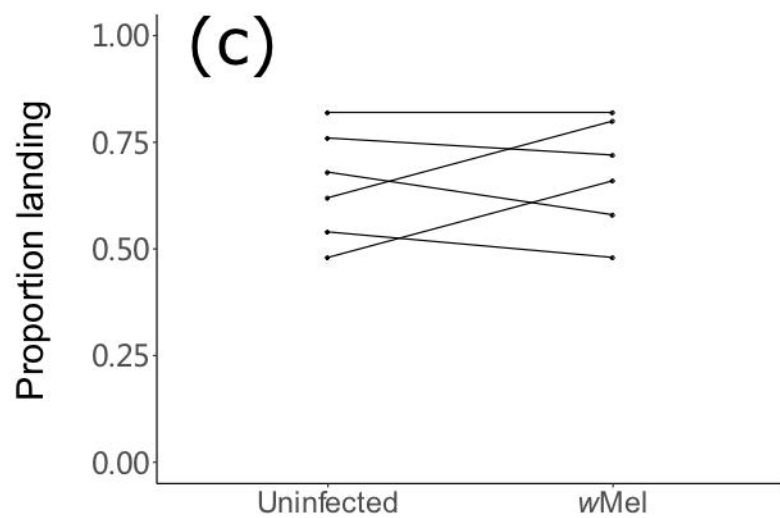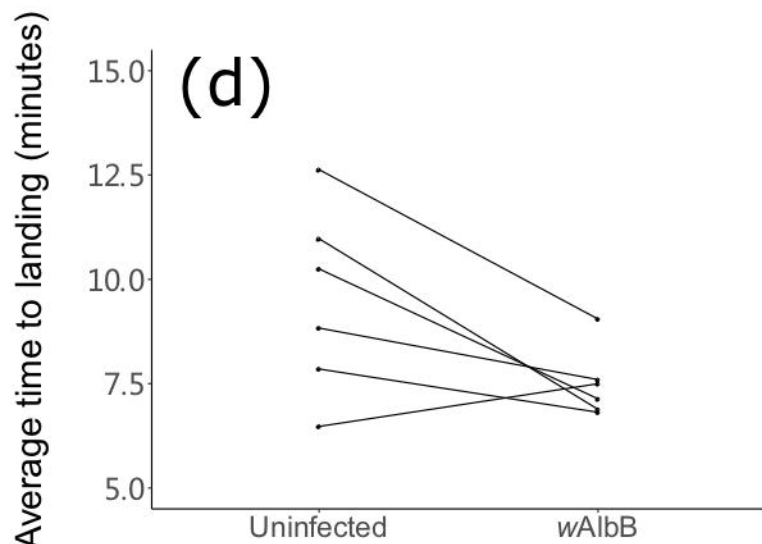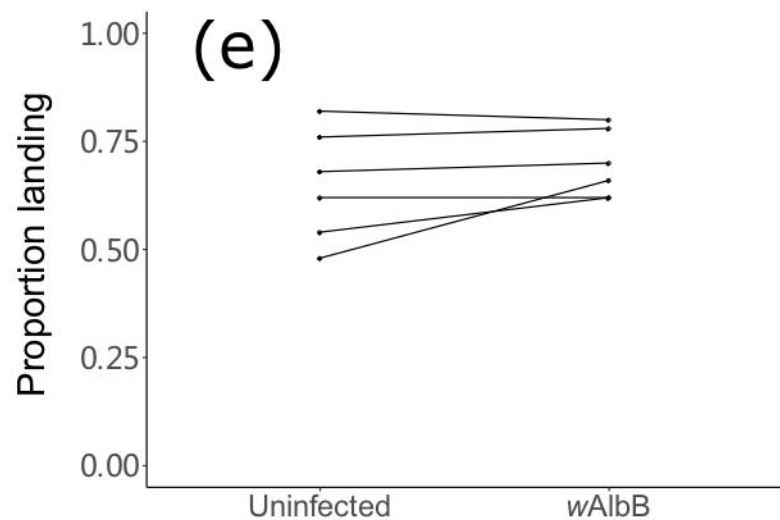

Wing length(mm)

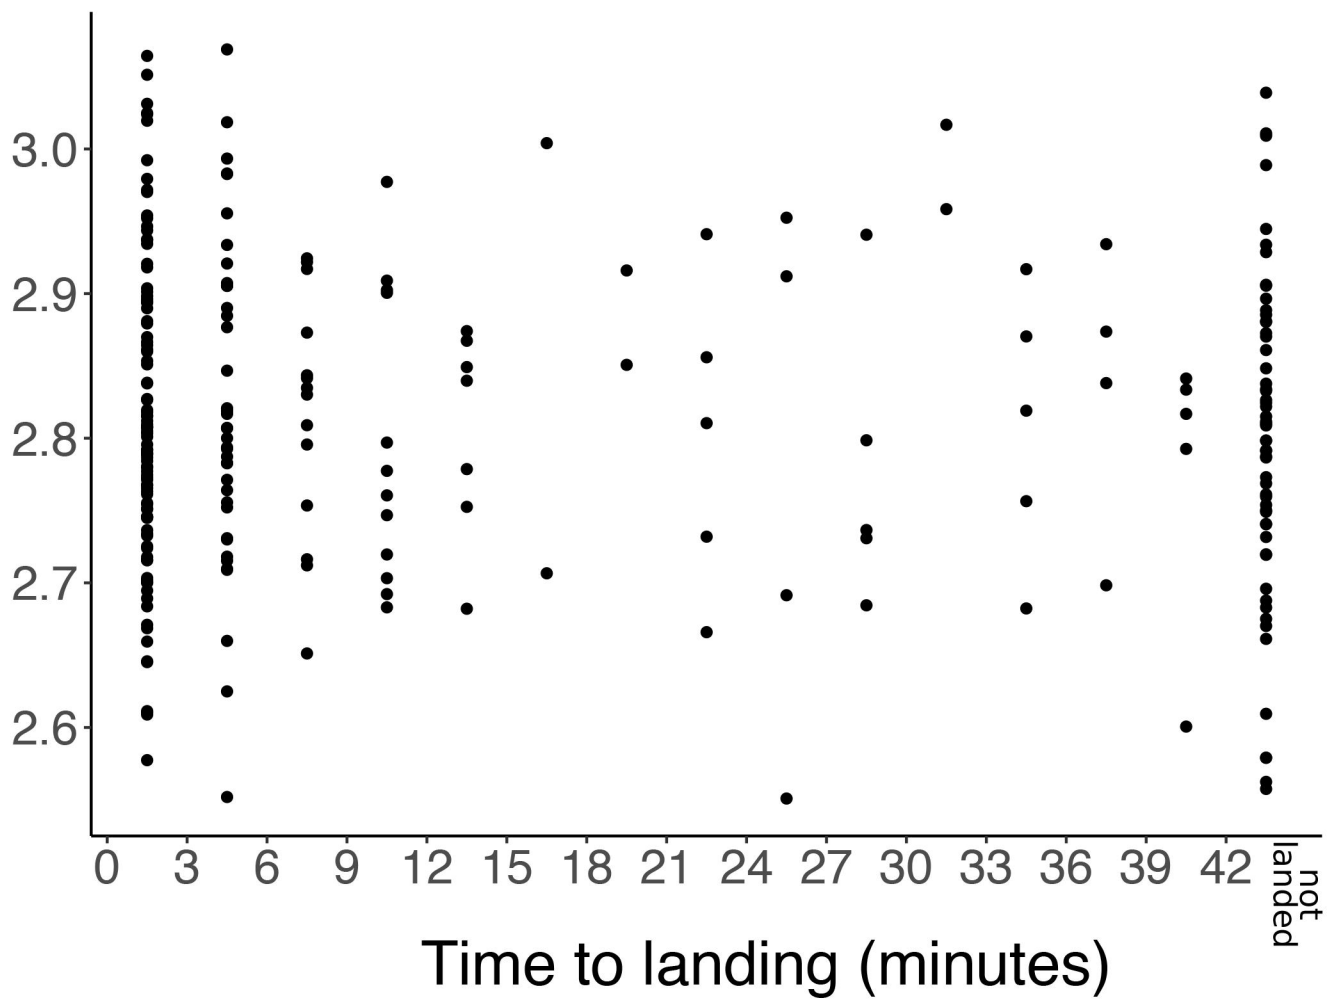

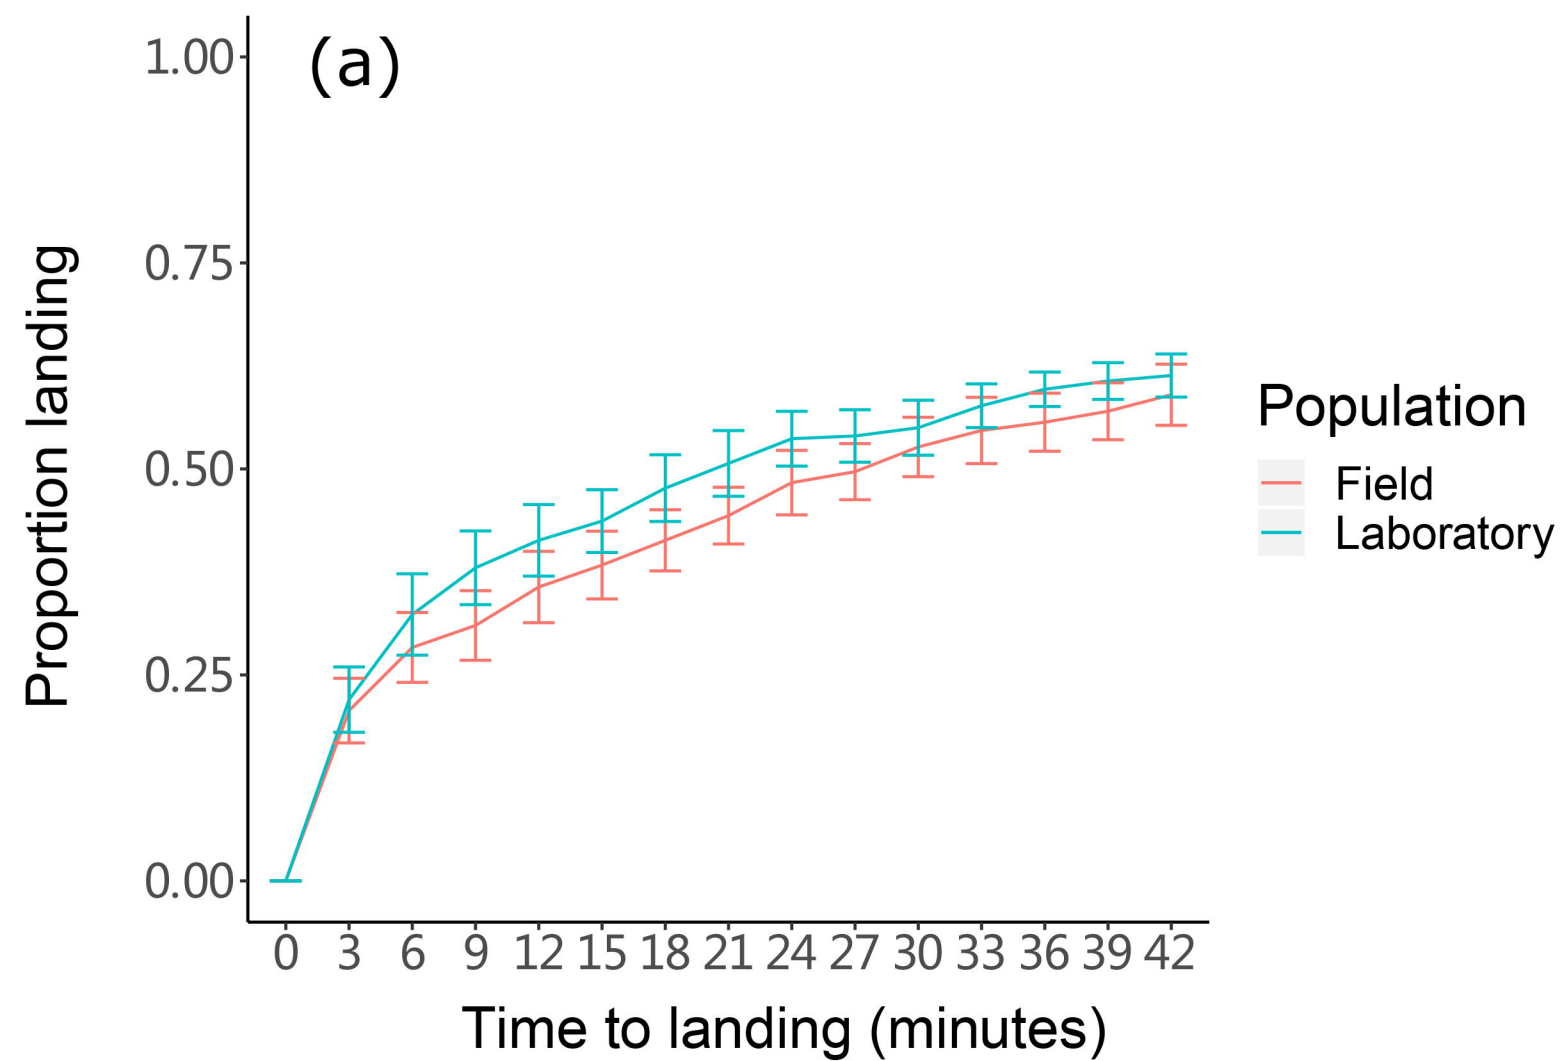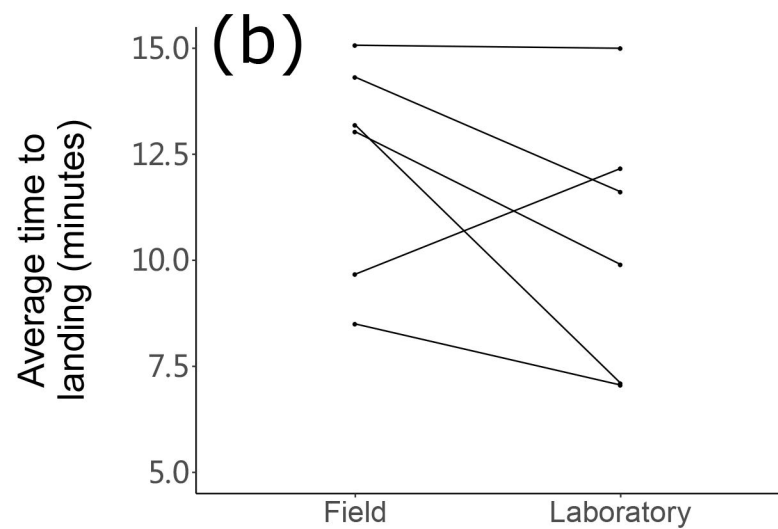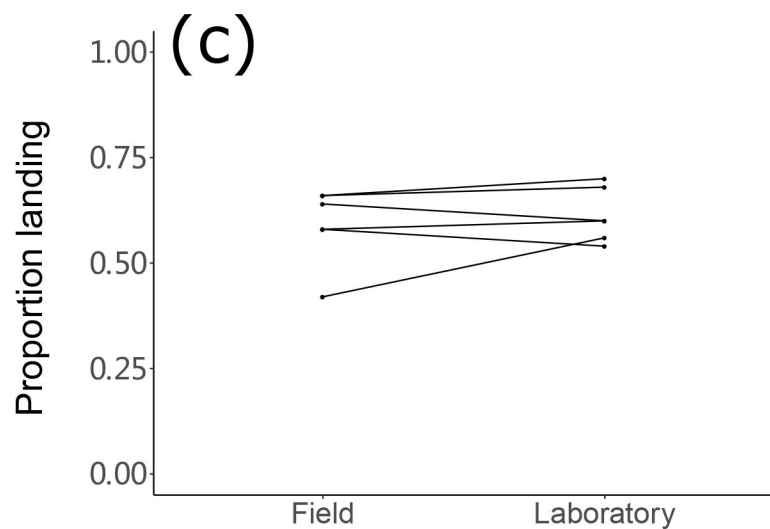

Source: https://www.biorxiv.org/content/10.1101/695528v1.full.pdf
